# Supplementary material
Source: MDPI journal article supplement (https://www.mdpi.com/2076-3263/9/3/110)

## Sample MS17-37

Reflected light image showing a recrystallized magnetite in sample MS17-37

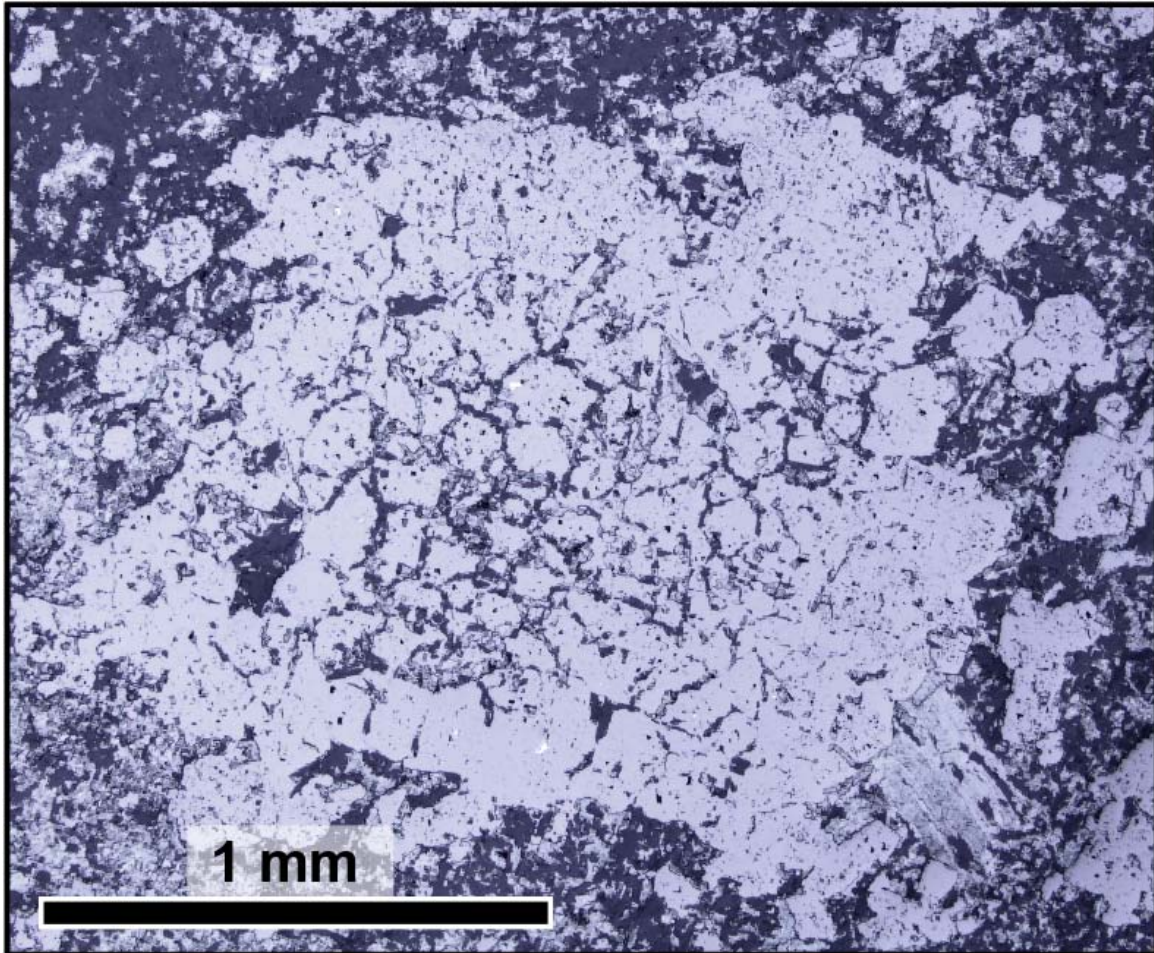

Chemical map (LA-ICP-MS) displaying three elements:  $^{52}\text{Cr}$  (red) +  $^{52}\text{Cr}$  (green) +  $^{57}\text{Fe}$  (blue)

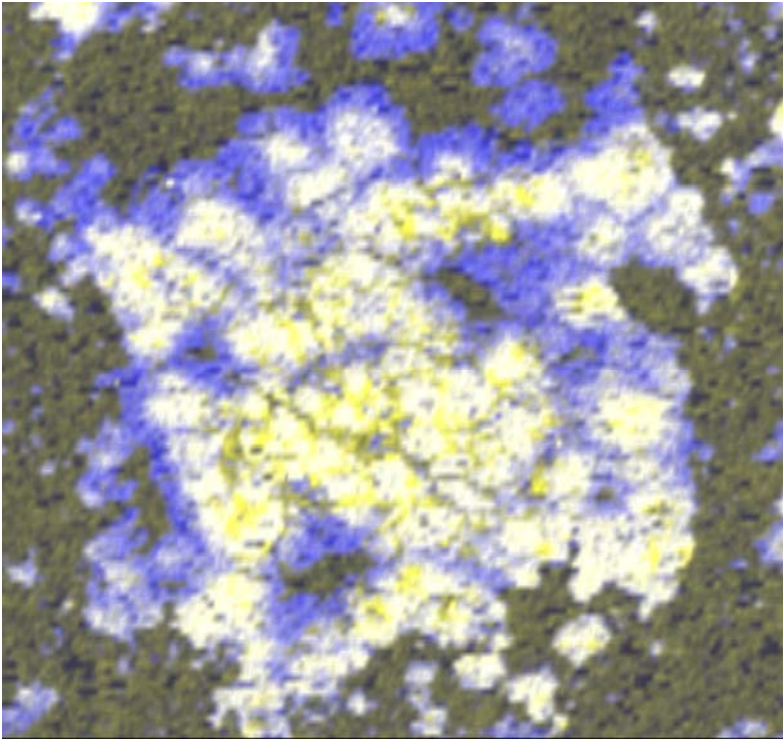

Chemical map (LA-ICP-MS) displaying three elements:  $^{51}\text{V}$  (red) +  $^{51}\text{V}$  (green) +  $^{57}\text{Fe}$  (blue)

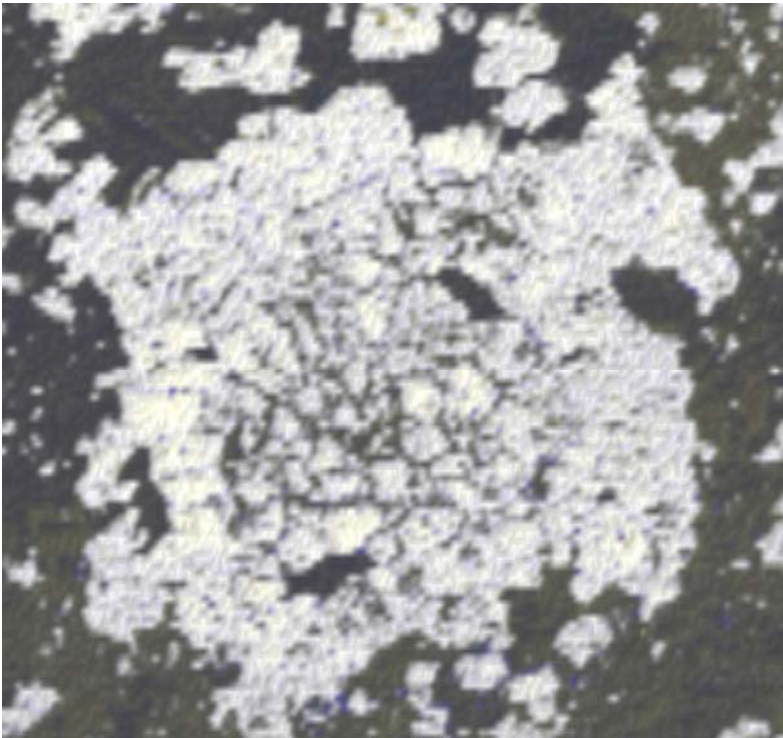

Chemical map (LA-ICP-MS) displaying three elements:  $^{55}\text{Mn}$  (red) +  $^{55}\text{Mn}$  (green) +  $^{57}\text{Fe}$  (blue)

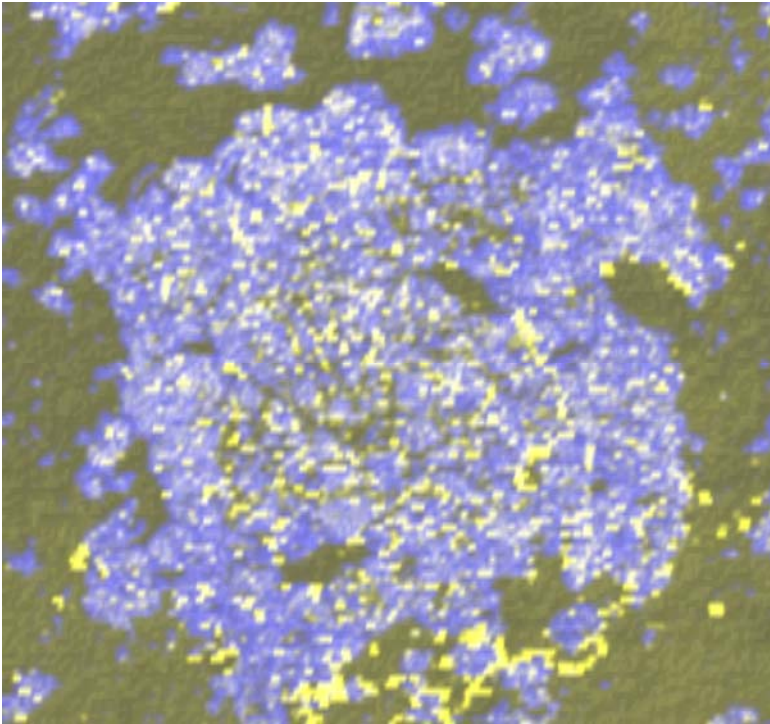

Chemical map (LA-ICP-MS) displaying three elements:  $^{47}\text{Ti}$  (red) +  $^{47}\text{Ti}$  (green) +  $^{57}\text{Fe}$  (blue)

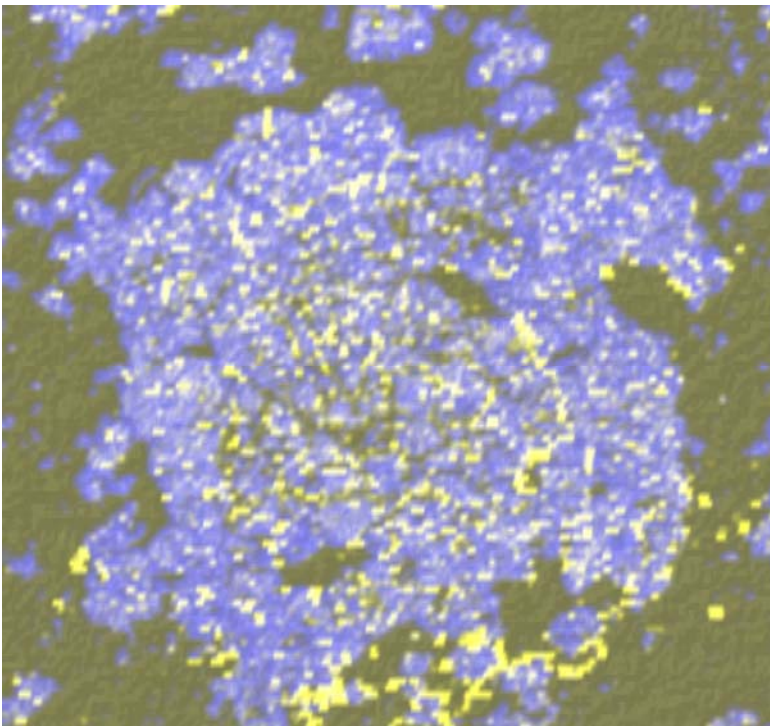

Chemical map (LA-ICP-MS) displaying three elements:  $^{93}\text{Nb}$  (red) +  $^{93}\text{Nb}$  (green) +  $^{57}\text{Fe}$  (blue)

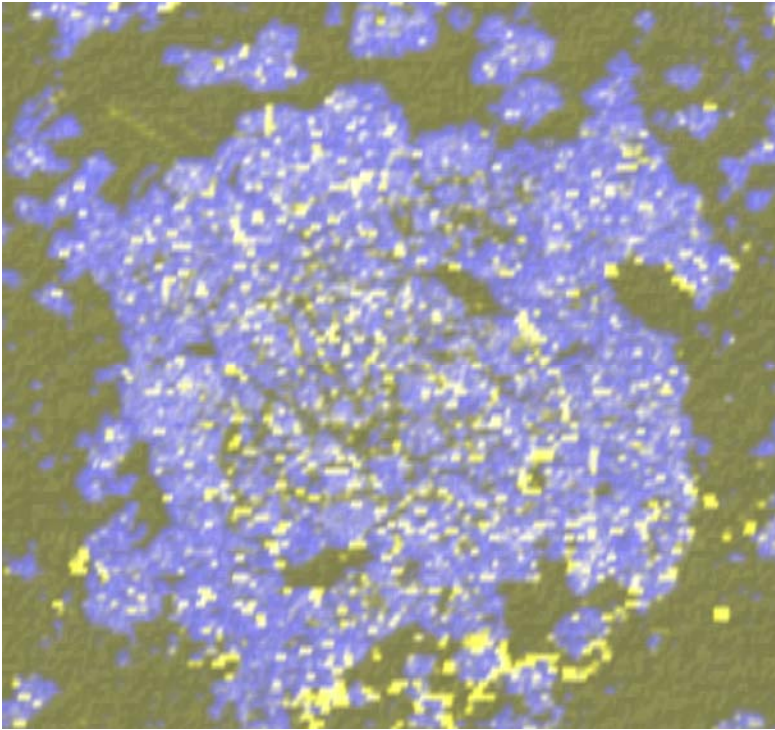

Chemical map (LA-ICP-MS) displaying three elements:  $^{39}\text{K}$  (red) +  $^{39}\text{K}$  (green) +  $^{57}\text{Fe}$  (blue)

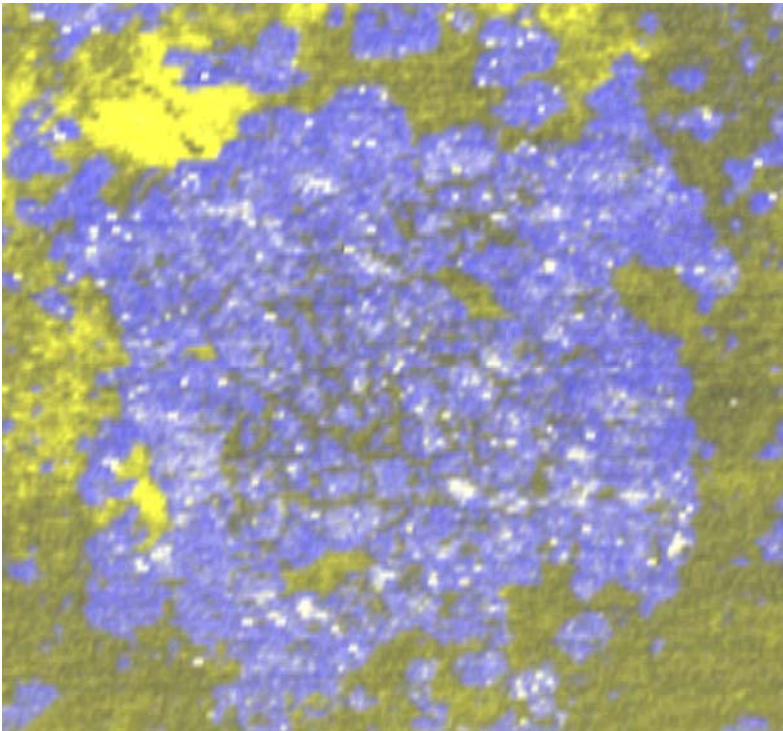

Chemical map (LA-ICP-MS) displaying three elements:  $^{23}\text{Na}$  (red) +  $^{23}\text{Na}$  (green) +  $^{57}\text{Fe}$  (blue)

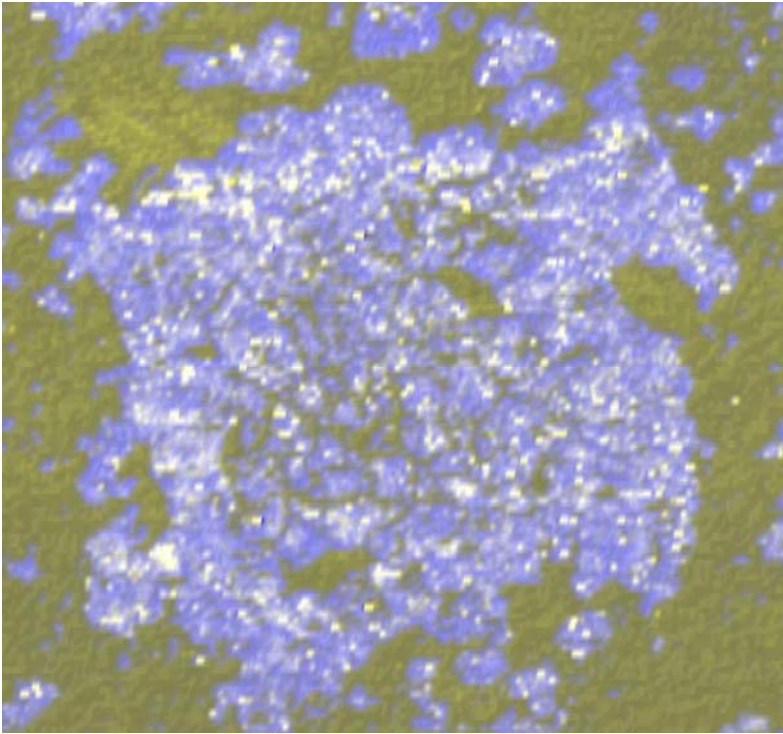

Chemical map (LA-ICP-MS) displaying three elements:  $^{59}\text{Co}$  (red) +  $^{59}\text{Co}$  (green) +  $^{57}\text{Fe}$  (blue)

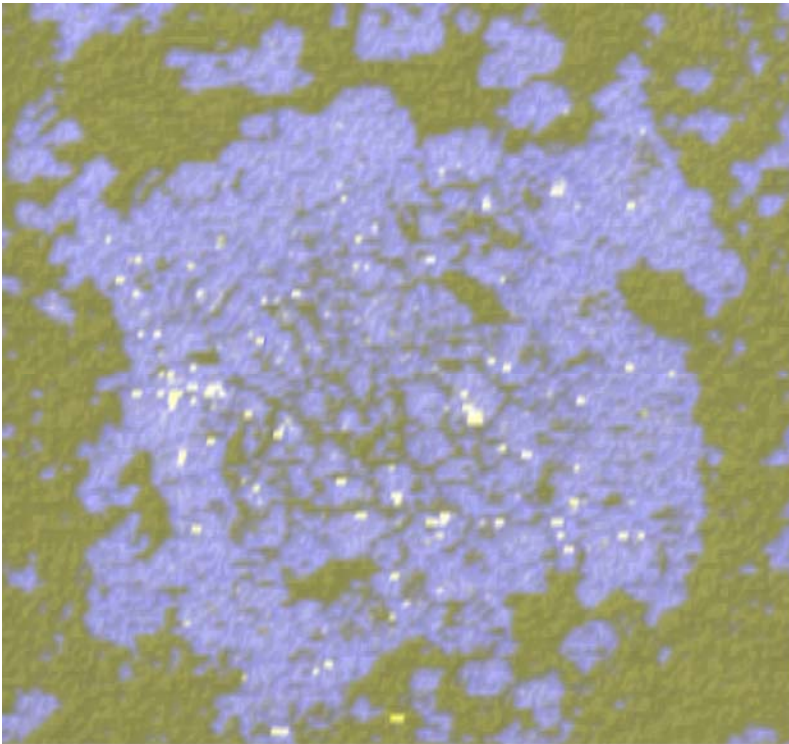

Chemical map (LA-ICP-MS) displaying three elements:  $^{63}\text{Cu}$  (red) +  $^{63}\text{Cu}$  (green) +  $^{57}\text{Fe}$  (blue)

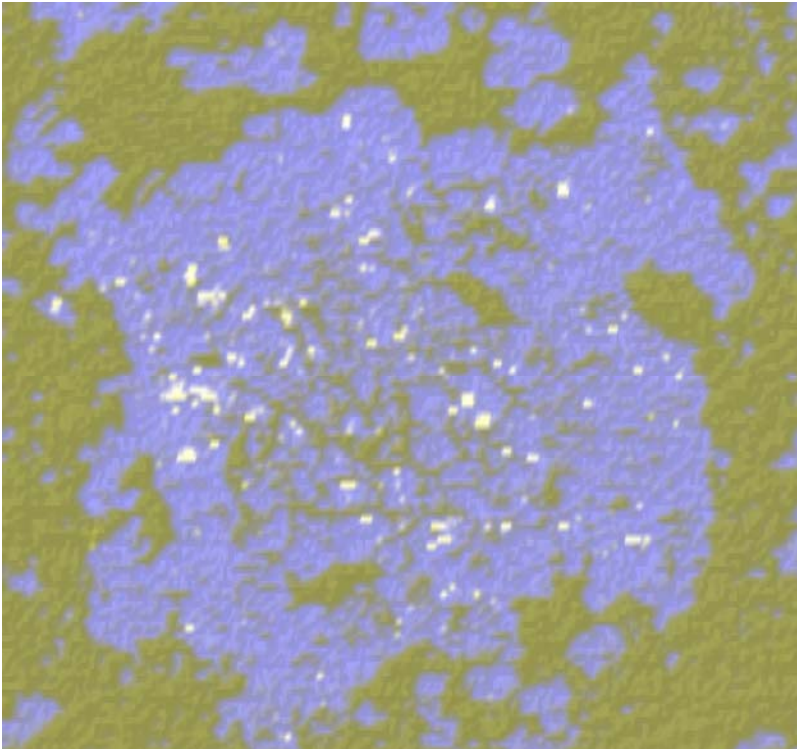

Chemical map (LA-ICP-MS) displaying three elements:  $^{60}\text{Ni}$  (red) +  $^{60}\text{Ni}$  (green) +  $^{57}\text{Fe}$  (blue)

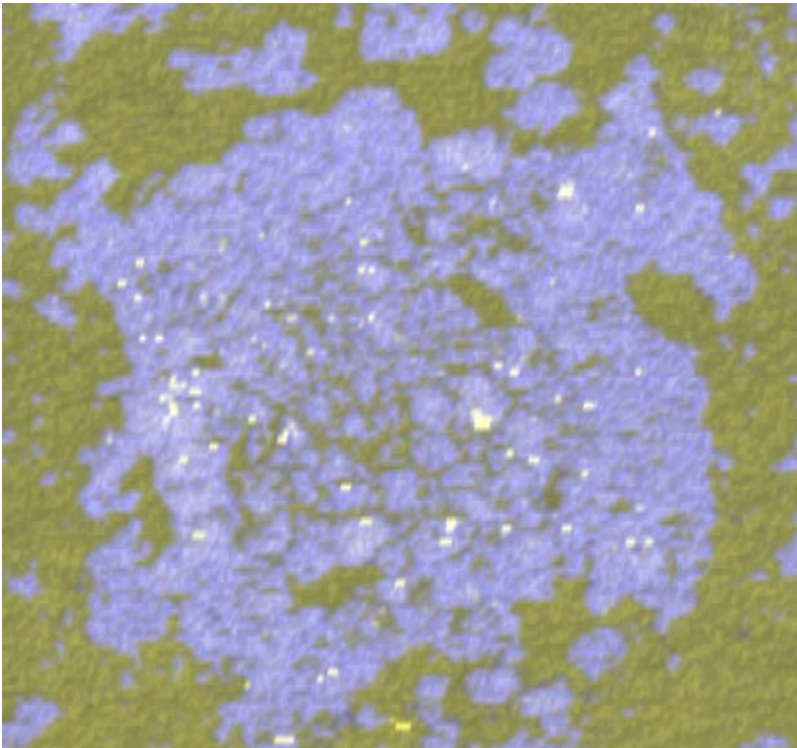

Chemical map (LA-ICP-MS) displaying three elements:  $^{66}\text{Zn}$  (red) +  $^{66}\text{Zn}$  (green) +  $^{57}\text{Fe}$  (blue)

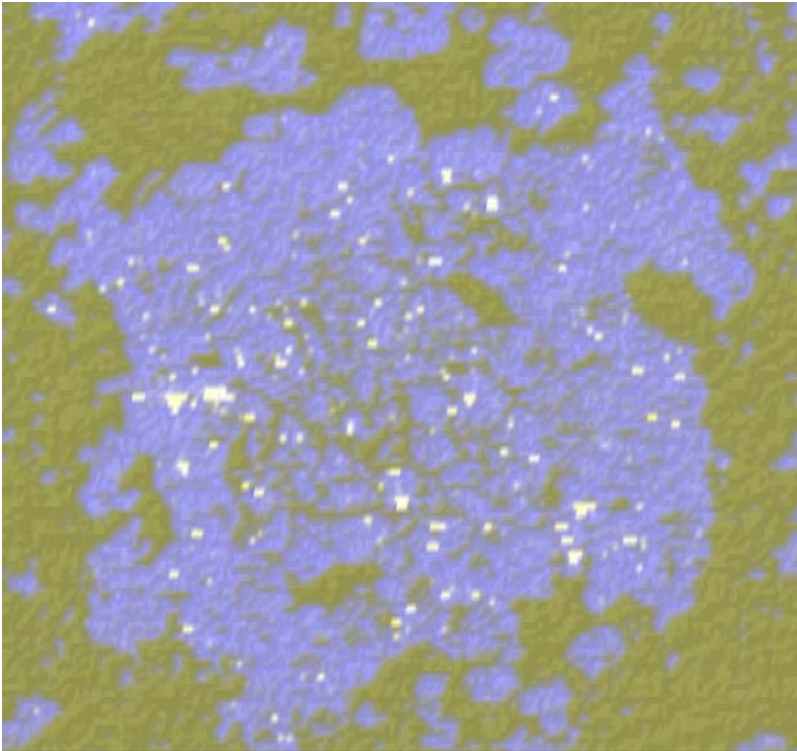

Chemical map (LA-ICP-MS) displaying three elements:  $^{139}\text{La}$  (red) +  $^{139}\text{La}$  (green) +  $^{57}\text{Fe}$  (blue)

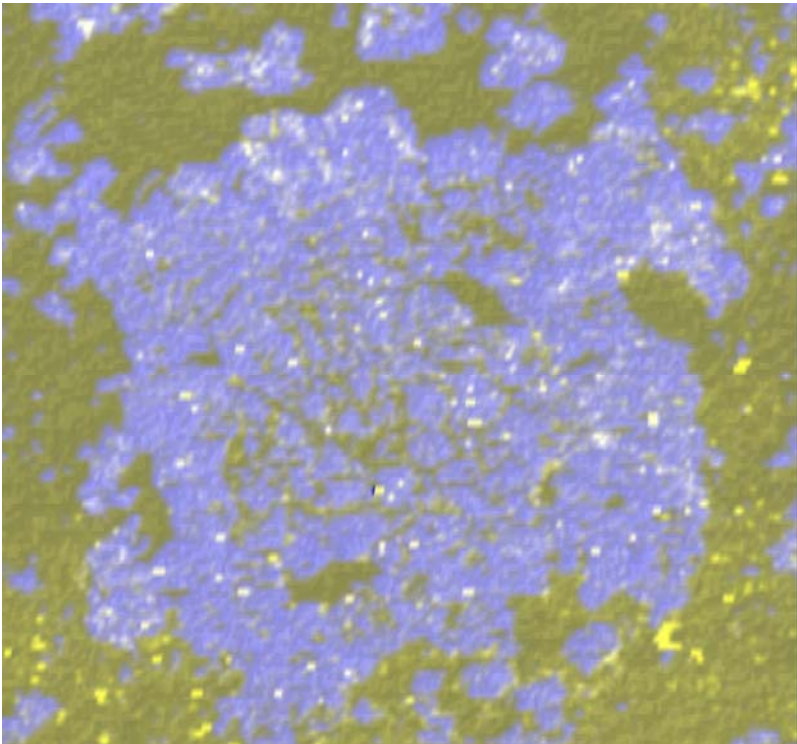

Chemical map (LA-ICP-MS) displaying three elements:  $^{44}\text{Ca}$  (red) +  $^{44}\text{Ca}$  (green) +  $^{57}\text{Fe}$  (blue)

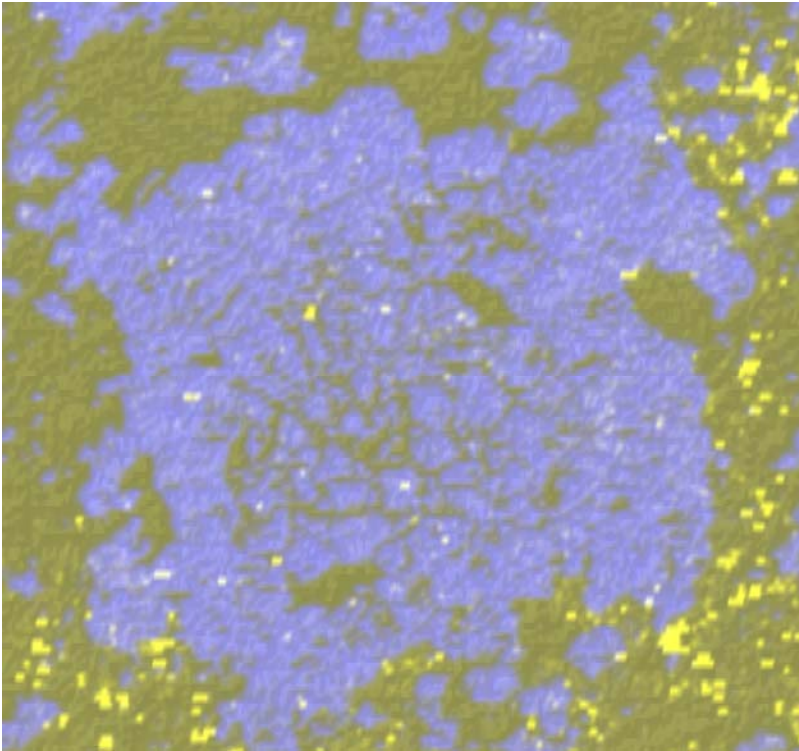

Chemical map (LA-ICP-MS) displaying three elements:  $^{31}\text{P}$  (red) +  $^{31}\text{P}$  (green) +  $^{57}\text{Fe}$  (blue)

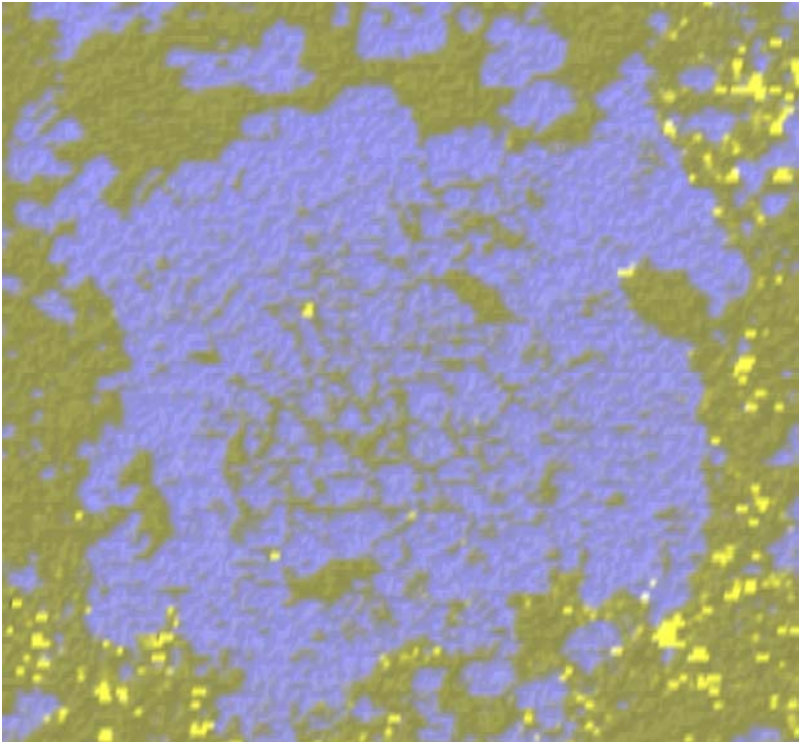

Chemical map (LA-ICP-MS) displaying three elements:  $^{89}\text{Y}$  (red) +  $^{89}\text{Y}$  (green) +  $^{57}\text{Fe}$  (blue)

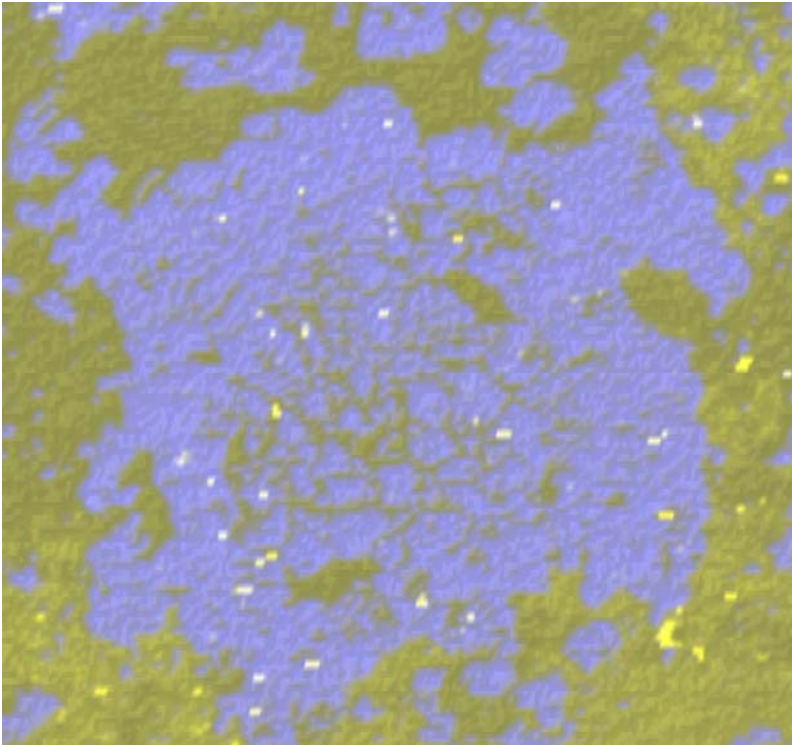

Chemical map (LA-ICP-MS) displaying three elements:  $^{172}\text{Yb}$  (red) +  $^{172}\text{Yb}$  (green) +  $^{57}\text{Fe}$  (blue)

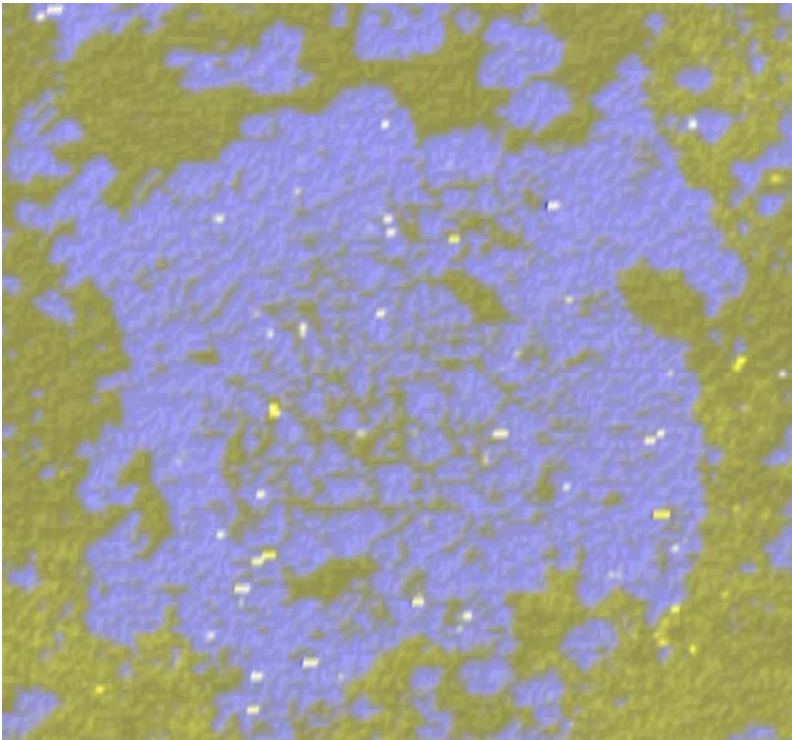

Chemical map (LA-ICP-MS) displaying three elements:  $^{90}\text{Zr}$  (red) +  $^{90}\text{Zr}$  (green) +  $^{57}\text{Fe}$  (blue)

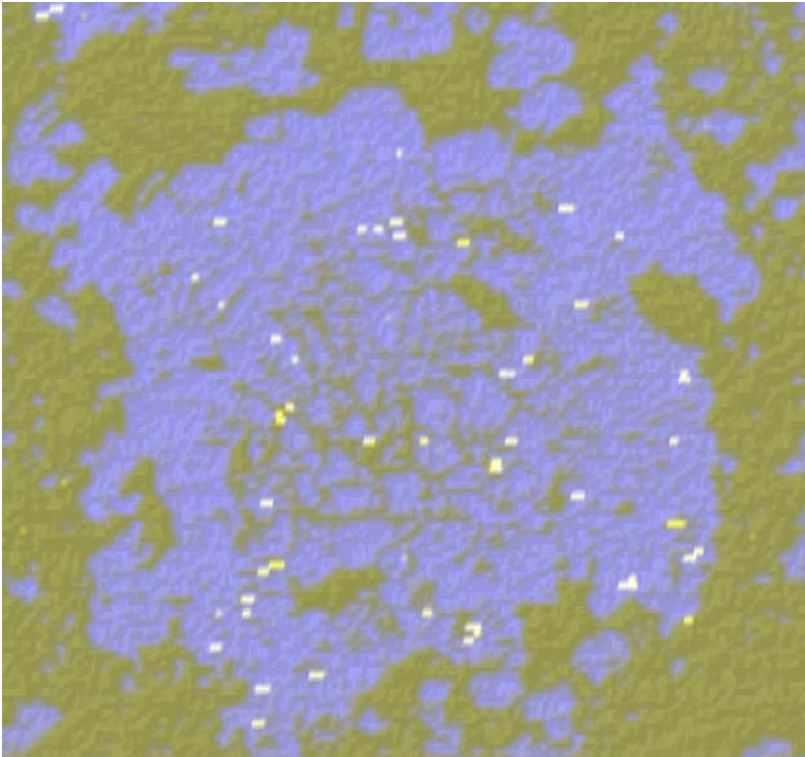

Supplement: s1 [file s1 › Supplemental_material_S10.pdf]
