# Supplementary material
Source: MDPI journal article supplement (https://www.mdpi.com/2076-3263/9/3/110)
Supplement: s1 [file s1]

Archive with 3 entries (3 files):
- Supplemental_material_S1-8.xlsx
- Supplemental_material_S10.pdf
- Supplemental_material_S9.pdf
