# Supplementary material
Source: MDPI journal article supplement (https://www.mdpi.com/2076-3263/9/3/110)
Supplement: s1 [file s1 › Supplemental_material_S1-8.xlsx]

## Sheet: List-of-documents
	List of documents contained in this file:
	1. List of samples
	S1	location of half core samples examined (drill hole MS-13-17)
	2. LA-ICP-MS analyses
	S2	Standard GSE-1g
	S3	Standard BC28
	S4	Standard Gprob6-A
	S5	Standard UQAC-FeS1
	S6	in-situ analyses performed on silicates
	S7	in-situ analyses performed on magnetites
	S8	Temperature and fO2 conditions of equilibrium between magnetite and ilmenite calculated using the ILMAT Excel worksheet (Lepage 2003)

## Sheet: S1
Sample #	START	END	Core log	This study	In-situ analyses	Whole rock analyses
MS17-45	8.35	8.67	ferro-pyroxenite	ultramafic rock (layered zone)	YES	YES
MS17-46	30.7	31	ferro-pyroxenite	ultramafic rock (layered zone)
MS17-47	56.67	57	ferro-pyroxenite	ultramafic rock (layered zone)
MS17-23	67	67.5	ferro-pyroxenite	ultramafic rock (layered zone)
MS17-24	73.45	74.03	ferro-pyroxenite	ultramafic rock (layered zone)				Legend
MS17-25	76.16	76.56	ferro-pyroxenite	ultramafic rock (layered zone)				Field	Signification
MS17-26	79.13	79.5	ferro-pyroxenite	ultramafic rock (layered zone)				Sample #	sample number
MS17-27	95.19	96.55	ferro-pyroxenite	ultramafic rock (layered zone)				START	Downhole location sample top (in m)
MS17-28	104.1	104.5	ferro-pyroxenite	ultramafic rock (layered zone)	YES	YES		END	Downhole location sample bottom (in m)
MS17-29	111	111.6	ferro-pyroxenite	ultramafic rock (layered zone)				Core log	Rock type as reported in the drill core log (GM-68458 document)
MS17-30	122.35	122.7	ferro-pyroxenite	ultramafic rock (layered zone)				This study	Rock type as interpreted by this study
MS17-31	166.5	167	pyroxene-gabbro	ultramafic rock (layered zone)	YES			In-situ analyses	Thin section and in-situ (LA-ICP-MS) analyses performed
MS17-32	172	172.45	gabbro	mafic dyke				Whole rock analyses	Whole rock analysis performed for the need of this study
MS17-33	173.75	174	gabbro	mafic dyke
MS17-34	177	177.39	Gabbronorite (dyke?)	ultramafic rock (layered zone)
MS17-35	179.6	179.9	gabbro	ultramafic rock (layered zone)
MS17-36	198.36	198.75	Gabbronorite (dyke?)	ultramafic rock (layered zone)	YES	YES
MS17-37	204.6	205	pyroxene-gabbro	ultramafic rock (layered zone)	YES	YES
MS17-38	219	219.4	gabbro	mafic dyke	YES
MS17-39	227.1	227.35	ferro-pyroxenite	ultramafic rock (layered zone)
MS17-40	258.78	259.18	ferro-pyroxenite	ultramafic rock (layered zone)
MS17-41	273.78	274.1	ferro-pyroxenite	ultramafic rock (layered zone)
MS17-42	289.73	290.1	ferro-pyroxenite	ultramafic rock (layered zone)
MS17-43	296.12	296.5	ferro-pyroxenite	ultramafic rock (layered zone)
MS17-44	309	309.45	ferro-pyroxenite	ultramafic rock (layered zone)
MS17-01	317.46	317.88	ferro-pyroxenite	ultramafic rock (layered zone)
MS17-02	320	320.4	ferro-pyroxenite	ultramafic rock (layered zone)	YES
MS17-03	327.14	327.62	ferro-pyroxenite	magnetitite (layered zone)
MS17-04	332.14	332.66	ferro-pyroxenite	magnetitite (layered zone)	YES
MS17-05	339.62	340.08	ferro-pyroxenite	mafic volcanic rocks
MS17-06	346.34	346.85	ferro-pyroxenite	mafic volcanic rocks
MS17-07	351.78	352.32	massive sulphide	semi-massive sulphides	YES
MS17-08	366.42	366.69	chlorite schist	mafic volcanic rocks	YES
MS17-09	368.05	368.38	massive sulphide	mafic volcanic rocks
MS17-10	375.61	375.95	massive sulphide	mafic volcanic rocks		YES
MS17-11	378.08	378.6	gabbronorite	mafic volcanic rocks
MS17-12	393.08	393.58	gabbronorite	mafic volcanic rocks
MS17-13	402	402.33	gabbronorite	mafic volcanic rocks
MS17-14	414	414.34	gabbronorite	mafic volcanic rocks	YES	YES
MS17-15	437.45	437.8	gabbronorite	mafic volcanic rocks
MS17-16	462.66	462.98	gabbronorite	mafic volcanic rocks	YES
MS17-17	476.3	476.63	gabbronorite	mafic volcanic rocks
MS17-18	500.51	500.84	gabbronorite	mafic volcanic rocks
MS17-19	516.3	516.66	gabbronorite	mafic volcanic rocks
MS17-20	525	525.34	argilite	mafic volcanic rocks	YES	YES
MS17-21	548.5	548.75	basalt	mafic volcanic rocks
MS17-22	569.74	570	basalt	mafic volcanic rocks

## Sheet: S2
	Analysed values													Reference values
Element Total	GSE-1g-A-1	GSE-1g-A-2	GSE-1g-A-3	GSE-1g-A-4	GSE-1g-A-5	GSE-1g-A-6	GSE-1g-A-7	GSE-1g-A-8	GSE-1g-A-9	GSE-1g-A-10	GSE-1g-A-11	GSE-1g-A-12		Certified values	Uncertainty		Used for	Reference material
Na	27719.2	28664.5	29186	29328.3	28884.8	28960.2	29795	28456.5	29777.9	28595.8	28832.7	29005.9		28934	1484		Standard Name	GSE-1g
Mg	20539.6	20989.9	21308.7	21516.6	20995.5	21082.9	21308.9	20782.9	21613.1	20990.3	21046	21097.1		21106	181		Data source	GeoRem database as of february 2011 [http://georem.mpch-mainz.gwdg.de/]
Al	67919.2	68359.1	69298.1	70045.4	67976.9	68462.1	69567.1	67955.4	69000.6	68346.5	69223	69494.5		68804	2117		Matrix	Glass
Si	260670	249756	252155	254001	245539	248058	246779	256649	244646	248414	249671	255609		250994	7011
P	66.87	69.62	71.22	79.63	68.07	61.35	73.24	65.04	77.43	65.67	68.33	73.53		70	20
K	21192.2	21467.3	21970.3	22067.6	21601.9	21655.5	22645.3	22342.3	21653.4	21551.8	21779.6	21672.9		21800	200
Ca	51214	52301.3	53622	53467.9	52372.8	52453	54574.9	52923.6	51946.3	51079.7	54207.2	54133.2		52858	2143
Ti	440.75	442.46	451.54	454.97	444.93	447.64	467.71	463.42	434.96	450.12	444.28	457.21		450	42
V	431.2	436.4	442.52	445.3	437.51	437.82	449.24	448.02	444.03	434.21	435.61	438.13		440	20
Cr	401.24	398.36	398.05	398.2	402.79	398.41	402.95	399.4	404.89	399.74	394.74	401.23		400	80
Mn	578.41	587.2	593.97	596.19	586.92	587.05	600.25	587.54	591.94	584.76	593.14	592.61		590	20
Fe	98717	98717	98717	98717	98717	98717	98717	98717	98717	98717	98717	98717		98717	2332
Co	381.92	381.51	381.55	383.93	375.3	376.8	378.98	381.87	379.95	379.08	377.88	381.23		380	20
Ni	445.62	441.73	440.01	440.1	434.83	435.18	442.53	441.85	432.89	439.19	431.21	454.86		440	30
Cu	386.5	382.76	379	379.56	375.51	377.57	379.11	378.85	374.92	385.05	375.69	385.49		380	40
Zn	440.86	466.71	465.4	465	459.74	460.11	462.17	413.18	453.58	480.75	472.67	479.82		460	10
Y	402.6	410.01	417.02	418.81	406.63	406.97	407.95	415.07	403.43	398.83	420.78	411.88		410	30
Zr	401.88	410.51	416.41	418.32	408.13	407.57	407.17	415.63	403.41	400.47	418.7	411.79		410	30
Nb	413.45	420.41	426.85	427.1	417.48	416.15	418.56	430.27	416.75	410.67	424.63	417.68		420	40
La	379.8	395.83	401.87	400.48	389.67	387.33	388.97	396.45	392.39	377.88	402.87	390.42		392	4
Ce	400.45	418.97	423.46	423.68	411.41	409.29	410.67	416.03	418.45	398.45	425.63	411.48		414	4
Pr	443	466.79	472.99	470.61	456.43	454.01	456.09	461.44	466.85	441.13	473.81	456.81		460	10
Nd	438.11	460.39	464.36	463.28	447.83	446.1	450.87	457.39	457.37	433.07	463.4	453.88		453	5
Sm	470.17	497.94	501.76	499.63	479.82	480.7	485.89	490.63	495.51	464.63	505.41	483.91		488	5
Eu	390.67	418.63	421.85	420.94	408.7	404.21	404.88	408.27	419.89	393.74	421.69	406.44		410	20
Gd	493.99	524.75	526.02	525.7	509.69	507.98	509.76	514.03	523.34	495.52	523.92	513.28		514	6
Tb	457.69	488.87	492.81	492.47	479.14	476.14	472.76	480	480	480	480	480		480	20
Dy	499	532.71	540.13	537.75	523.67	518.86	515.75	524	524	524	524	524		524	6
Ho	476.38	508.91	515.57	515	501.64	497.28	492.09	492.79	522.21	478.95	515.4	495.64		501	8
Er	592.15	607.47	601.16	572.44	600.1	597.31	594.48	563.97	651.76	560.13	609.87	588.59		595	6
Tm	475.13	509.51	514.06	513.24	499.27	497.38	491.27	492.18	521.16	476.21	517.76	492.67		500	20
Yb	490.94	533.72	536.9	531.41	517.5	519.24	510.13	513.08	540.52	495.4	537.8	513.22		520	5
Lu	490.8	528.15	532.23	532.44	517.42	516.89	507.89	509.34	541.02	492.58	536.85	510.19		518	6
Hf	372.25	401.57	406.53	407.18	395.98	396.28	385.06	388.35	413.54	374.54	407.84	390.73		395	7
Ta	367.08	398.41	399.61	401.43	390.83	392.51	379.99	381.53	409.85	371.8	400.46	386.31		390	40

## Sheet: S3
	Analysed values												Reference values
	BC28-1	BC28-2	BC28-3	BC28-4	BC28-5	BC28-6	BC28-7	BC28-8	BC28-9	BC28-10	BC28-11		Reference values		Used for	Quality control
Mg	11280.4	9735.27	11207	10232.4	10569.4	11555.4	9180.36	10447.2	10734.1	11967	8086.55		11618		Standard Name	BC-28
Al	18143.3	15435.3	18927.2	17426.7	16769.3	16862.9	19841.2	17876.4	16274.2	19285.5	18895.9		20787		Data source	Dare et al. (2012)
Si	812.77	1419.91	594.73	499.85	404	1337.18	6453.26	2776.09	586.41	360.7	1941.79		220		Matrix	Natural Magnetite from Bushveld (UQAC in-house standard)
Ti	74024.4	82130.5	73870.6	79206.4	80541.7	77502	72998.4	76405.8	79478.6	73749.7	69676.5		87615
V	8894.81	9870.63	9293.7	9613	9734.9	9353.91	8961.02	9327.91	9835.15	9182.3	8872.12		9603
Cr	1344.59	1481.79	1435.64	1461.06	1470.16	1397.53	1340.75	1408.49	1477.03	1397.33	1324.58		1172
Mn	2000.97	1893.7	1939.91	1882.06	1908.7	1843.95	2012.16	1890.26	1862.25	1876.52	1930.52		2125
Fe	571806	571806	571806	571806	571806	571806	571806	571806	571806	571806	571806		571806
Co	296.87	282.37	288.44	281.54	293.07	286.66	278.29	268.06	289.05	288.36	269.09		241
Ni	600.88	632.36	590.13	594.12	612.66	594.11	569.76	568.53	624.59	589.74	564.42		573
Cu	6.25	75.48	9.41	52.91	54.57	14.73	19.53	26.33	56.6	4.09	27.47		33
Zn	289.02	327.3	346.52	364.43	342.12	319.98	354.39	375.69	383.72	404.67	442.45		588
Y		0.02		0.01	0.01		0.02	0.01	0.01		0.09		0.08025
Zr	19.73	20.38	17.72	20.56	20.61	19.14	19.18	20.05	21.35	16.99	18.63		39.162
Nb	1.45	1.59	1.25	1.46	1.51	1.41	1.33	1.42	1.47	1.32	1.31		1.7227
Hf	0.72	0.74	0.71	0.8	0.75	0.74	0.74	0.77	0.73	0.69	0.7		0.583
Ta	0.11	0.12	0.09	0.1	0.12	0.1	0.11	0.11	0.11	0.1	0.09		0.07

## Sheet: S4
	Analysed values												Reference values
Element Total	GP6-1	GP6-2	GP6-3	GP6-4	GP6-5	GP6-6	GP6-7	GP6-8	GP6-9	GP6-10	GP6-11		Certified values	Uncertainty		Used for	Quality control
Na	14412.4	14772.5	14904.3	14988.2	15323.4	14808.3	15060.1	15250.7	14859.2	15004.3	15001.6		15506	1335		Standard Name	Gprob6-A
Mg	49127.1	49739.6	50330.8	50520.8	50773.3	50217.6	50264.4	51137.3	50945.8	50753.8	51269.7		51318	6935		Data source	USGS; http://www.geoanalyst.org/g-probe-overview/
Al	88117.5	88724.3	89889.1	90556.7	90756.1	90037.2	87887.4	89974.7	91332.6	91904.3	92150.1		92145	12438		Matrix	Artificial basaltic glass
Si	229312	226821	225370	223808	224914	222013	230504	220215	223850	227960	231841		224259	9418
K	1089.08	1144.46	1150.99	1153.37	1146.5	1128.89	1052.14	1038.94	1071.38	1115.8	1309.39		1577	166
P	1454.76	1466.65	1494.93	1480.68	1863.06	1543.75	1603.34	1667.91	1523.36	1481.73	1512.22		611	131
Ca	83865.1	84934.3	86986.9	87584.9	87965.9	86857.1	86586.6	85839.3	86661.4	90087	89754.9		86787	4643
Ti	6988.36	7035.38	7227.29	7249.59	7280.09	7234.29	7251.49	7142.93	7171.23	7261.46	7233.14		7012	1319
V	258.78	262.54	264.76	263.85	266.37	264.51	261.96	260.5	267.61	267.12	275.51		238	27.1
Cr	335.77	340.42	340.01	341.84	336.23	334.6	334.65	332.18	341.15	329.96	348.05		300.2	21.5
Mn	1268.39	1279.34	1287.2	1290.67	1288.68	1288.85	1278.58	1286.36	1291.13	1303.99	1304.92		1255	93
Fe	72598	72598	72598	72598	72598	72598	72598	72598	72598	72598	72598		72598	13310
Co	46.63	46.19	46.63	46.03	46.61	46.73	46.59	47.32	47.58	47.38	49.31		46.9	3.51
Ni	153.29	145.81	152.39	148.59	166.67	157.58	161.26	156.27	151.52	152.56	160.32		145.7	18.9
Cu	80.6	77.81	82.02	77.96	78.89	82.63	79.86	84.52	80.37	79.91	83.02		89.5	20.31
Zn	86.44	87.67	95.8	97.33	96.7	98.44	74.56	84.6	82.65	84.99	85.27		70.8	16.6
Y	18	18.02	18.51	18.37	18.44	18.35	18.34	17.94	18.49	19.17	19.7		19.33	1.78
Zr	51.77	52.36	53.17	52.91	54.39	54.07	53.33	53.02	53.41	54.37	55.41		55.1	2.4
Nb	3.81	3.78	3.9	3.88	3.87	3.77	3.87	3.92	3.88	3.95	4.01		4.16	0.41
La	4.94	4.97	5.01	5.08	5.06	4.96	5.04	4.95	4.99	5.28	5.27		5.2	0.56
Ce	11.31	11.56	11.64	11.6	11.76	11.44	11.73	11.55	11.54	11.98	12.06		12	0.7
Pr	1.58	1.57	1.6	1.6	1.63	1.58	1.69	1.63	1.63	1.69	1.71		1.69	0.12
Nd	8.06	8.22	8.27	8.27	8.4	8.14	8.39	8.26	7.95	8.4	8.38		8.4	0.98
Sm	2.37	2.38	2.41	2.37	2.42	2.36	2.38	2.34	2.27	2.43	2.39		2.36	0.31
Eu	0.98	0.97	0.97	0.98	0.99	0.94	1	0.98	0.97	0.99	1.03		0.98	0.13
Gd	2.81	2.85	2.98	3	2.9	2.98	3.05	2.98	2.81	3.01	2.95		2.87	0.46
Tb	0.46	0.46	0.46	0.46	0.47	0.47	0.48	0.46	0.51	0.47	0.49		0.51	0.06
Dy	3.25	3.33	3.29	3.28	3.27	3.23	3.34	3.32	3.46	3.25	3.54		3.3	0.46
Ho	0.68	0.7	0.69	0.7	0.7	0.69	0.72	0.72	0.71	0.74	0.76		0.72	0.09
Er	1.97	2.24	2.26	2.2	2.1	1.99	2.55	2.43	2.16	2.28	2.23		2.1	0.34
Tm	0.29	0.29	0.3	0.3	0.3	0.3	0.31	0.32	0.3	0.31	0.3		0.31	0.05
Yb	1.95	2.04	2.04	2.07	2	2.03	2.11	2.12	2.03	2.11	2.11		2.06	0.33
Lu	0.3	0.29	0.3	0.3	0.3	0.3	0.32	0.32	0.29	0.31	0.32		0.32	0.04
Hf	1.37	1.37	1.42	1.45	1.47	1.46	1.49	1.53	1.46	1.53	1.52		1.52	0.15
Ta	0.23	0.22	0.23	0.23	0.23	0.23	0.25	0.23	0.23	0.25	0.24		0.28	0.03

## Sheet: S5
	Analysed values											Reference values
	FeS1-22-1	FeS1-22-2	FeS1-22-3	FeS1-22-4	FeS1-22-5	FeS1-22-6	FeS1-22-7	FeS1-22-8	FeS1-22-9	FeS1-22-10		Reference values	Uncertainty
Si	28788.2	27428.7	27643.8	28381.7	28117.9	27368.7	28161.2	25928	27441.3	27601.6		28300	2800		Used for	Quality control
Ti	293.67	280.83	288.89	306.03	290.68	325.42	321.34	291.68	294.44	276.79		300	30		Standard Name	UQAC-FeS1
V	21.1	20.33	21.28	20.51	20.9	20.86	20.55	20.29	20.84	21.02		21	2.1		Data source	Savard et al. (2018)
Cr	267.81	278.66	286.83	261.91	280.44	280.45	267.75	279.74	275.58	311.06		250	25		Matrix	Artificial sulfide
Mn	56.68	57.52	60.94	50.39	56.16	53.09	49.52	54.78	53.65	53.05		58	5.8
Fe	450000	450000	450000	450000	450000	450000	450000	450000	450000	450000		450000	45000
Co	681.03	649.9	658.9	661.24	647.17	655.24	672.74	668.9	678.24	689.51		650	65
Ni	27145.3	25562	25860	25724.9	25883.6	25460	26554	26126.8	26069.8	26713		25000	2500
Cu	24583.2	24618	24303.5	24772.6	24404.8	24213.8	24183.3	23792.2	24527.8	23779.1		23000	2300
Zn	330.34	310.24	294.82	287.71	314.32	273.34	276.32	309.37	269.19	307.21		275	27.5
Nb	39.15	35.59	37.01	36.51	34.74	36.99	35.04	33.28	34.35	43.6		40	4

## Sheet: S6
			SiO2	TiO2	Al2O3	CaO	FeO	MgO	Na2O	K2O	P2O5	MnO			V	Cr	Ni	La	Ce	Pr	Nd	Sm	Eu	Gd	Tb	Dy	Ho	Er	Tm	Yb	Lu
		Isotope	28	47	27	44	56	24	23	39	31	55			51	52	58	139	140	141	146	152	153	157	159	163	165	166	169	172	175
		Detection limit (ppm)	1500	0.1	0.2	5	1	0.1	0.7	2	15	1			0.03	1	0.1	0.01	0.01	0.01	0.01	0.02	0.01	0.03	0.01	0.02	0.01	0.02	0.01	0.01	0.01
		Unit (data below)	wt%	wt%	wt%	wt%	wt%	wt%	wt%	wt%	wt%	wt%	wt%		ppm	ppm	ppm	ppm	ppm	ppm	ppm	ppm	ppm	ppm	ppm	ppm	ppm	ppm	ppm	ppm	ppm
Sample	Main normative phase (>50%)	Secondary normative phase (>10%)	SiO2	TiO2	Al2O3	CaO	FeO	MgO	Na2O	K2O	P2O5	MnO	H2O_normative	Mg#	V	Cr	Ni	La	Ce	Pr	Nd	Sm	Eu	Gd	Tb	Dy	Ho	Er	Tm	Yb	Lu
MS17-02	actinolite	serpentine, chlorite	49.1504	0.0753114	5.68714	7.49052	8.306	23.088	0.42741	0.0302094	0.00995123	0.1602	5.57108	0.735427	14.0221	0.694025	11.3969	0.406028	1.23225	0.221427	1.27946	0.627927	0.124641	1.22281	0.212457	1.51552	0.330488	1.10477	0.166188	1.36444	0.283275
MS17-02	actinolite	serpentine, chlorite	46.435	0.131982	3.40423	7.81625	15.5407	21.0763	0.0999252	0.0154404	0.0363125	0.164243	5.26646	0.575589	63.9837	0.890372	10.779	0.420559	1.87073	0.348098	2.24487	1.05376	0.160551	1.74286	0.315419	2.07438	0.42198	1.17027	0.162446	1.22663	0.212647
MS17-02	chlorite	serpentine, actinolite	34.7838	0.0495006	13.9332	2.27854	8.91138	29.3893	0.0898668	0.011527		0.0934285	10.4494	0.767331	49.9636	1.99675	26.7717	0.274442	1.31625	0.226537	1.64307	0.608875	0.107449	0.850635	0.179081	1.07896	0.224747	0.653646	0.0958083	0.578432	0.123566
MS17-02	chlorite	serpentine, actinolite	37.6651	0.0317347	13.3407	1.9142	8.53056	28.4516	0.0427218	0.0154829	0.00934065	0.0953702	9.89262	0.769333	54.013	3.31105	21.7127	0.179743	0.721675	0.128388	0.725279	0.27975	0.05586	0.463998	0.0837899	0.644192	0.138298	0.391921	0.0648696	0.603648	0.155867
MS17-02	chlorite	serpentine, actinolite	36.4951	0.0631769	14.4736	1.47998	9.53637	27.6668	0.0740507	0.0285757	0.00901142	0.0938397	10.0711	0.743668	42.7123	0.651924	22.3087	0.20322	0.800293	0.157361	0.890214	0.360581	0.0597972	0.624948	0.109253	0.741845	0.156012	0.529632	0.05665	0.481075	0.0795797
MS17-02	actinolite	serpentine	52.1178	0.00792485	1.49611	7.68707	10.4687	23.1689	0.00830893	0.00258262	0.00228906	0.109316	4.92457	0.688781	32.6562	0.361262	22.7208	0.0665482	0.339396	0.085562	0.8271	0.503865	0.0418303	0.888894	0.163994	1.11706	0.221986	0.603688	0.0670236	0.408796	0.0651222
MS17-02	actinolite	serpentine	58.1138	0.00219555	0.0402944	11.9734	4.16246	22.9739	0.00816626	0.00241178	9.33809e-05	0.160126	2.56259	0.84661	1.41722		5.73899	0.031667	0.150053	0.0306926	0.196823	0.159309	0.0104745	0.39462	0.0446748	0.360517	0.0511544	0.201694	0.0204618	0.142258	0.0236285
MS17-02	chlorite	serpentine	30.0727	0.0300161	16.0305	0.124904	11.6109	30.0594	0.0101383	0.0229458	0.000483228	0.0780519	11.947	0.721362	69.7717	1.95009	32.1333	0.0955234	0.304619	0.0466612	0.216578	0.134701	0.00378572	0.158032	0.039618	0.191927	0.0554652	0.19853	0.0234186	0.183563	0.030814
MS17-02	chlorite	serpentine	30.9214	0.0281987	16.278	0.00416633	9.29794	31.1952	0.00131523	0.00355206		0.0708292	12.1867	0.770382	67.3869	4.17931	33.5384	0.0504853	0.11458	0.013653	0.0807765	0.0333642	0.00280962	0.106239	0.013214	0.0878006	0.0203258	0.0658504	0.010141	0.0921906	0.0119409
MS17-02	chlorite	serpentine	34.1483	0.0307288	15.8352	0.268027	9.27224	29.2494	0.0130185	0.00798971	0.00951107	0.077046	11.0784	0.759298	51.3463	1.07583	26.0857	0.0946906	0.408992	0.0626825	0.382319	0.161819	0.02205	0.417884	0.0986916	1.06249	0.355646	1.62263	0.284516	2.57843	0.569033
MS17-02	chlorite	serpentine	32.7182	0.0293399	15.8367	0.0749008	9.1299	30.3451	0.00514397	0.0338078	0.00595835	0.0742244	11.7377	0.768717	46.9508	2.00776	28.5401	0.0820756	0.272703	0.0368899	0.214897	0.0904596	0.00829581	0.207395	0.0383902	0.344188	0.102374	0.450092	0.0736915	0.723677	0.167681
MS17-02	actinolite	none	53.0745	0.0539264	2.30881	11.2997	6.51619	22.7097	0.275081	0.0352663	0.00977917	0.18212	3.53062	0.77704	9.9359	0.636669	7.775	0.567697	2.50327	0.484254	3.3811	1.52415	0.244539	2.5515	0.504512	3.45827	0.76545	2.37304	0.335698	2.37304	0.430234
MS17-02	actinolite	none	55.6767	0.0274168	2.20316	10.7065	6.2698	21.4278	0.200506	0.0275741	0.0446429	0.199115	3.21321	0.773634	8.86535	0.75491	7.25868	0.49795	2.25505	0.416652	2.62283	1.08736	0.202277	1.89211	0.338742	2.36151	0.481497	1.43723	0.208568	1.58725	0.306319
MS17-02	chlorite	none	30.9814	0.0290869	17.9241	0.153299	9.68864	29.2745	0.00449998	0.0172452	0.000862903	0.0673202	11.855	0.751339	22.0793		33.3159	0.026883	0.095633	0.0180689	0.103566	0.0524439	0.00290865	0.108413	0.0137941	0.0718349	0.0223878	0.0647836	0.0107091	0.0713942	0.0167468
MS17-02	chlorite	none	31.8445	0.0402272	16.342	1.09351	9.48935	29.6211	0.0159529	0.017385	0.000238792	0.0873595	11.4409	0.75737	38.8299	0.185958	30.7262	0.134598	0.546364	0.117331	0.80582	0.366161	0.0469324	0.606579	0.10759	0.712841	0.166034	0.417964	0.0650854	0.495889	0.103163
MS17-02	chlorite	none	30.4091	0.0343948	18.4526	0.0501226	9.8032	29.1699	0.00346834	0.0214045	0.00899085	0.073749	11.9629	0.748462	54.7968	1.51406	31.8293	0.0520679	0.172973	0.0239433	0.124558	0.0646998	0.00466543	0.103432	0.0238113	0.214786	0.0616189	0.277285	0.0497352	0.413727	0.0871467
MS17-02	chlorite	none	31.0134	0.0307131	17.2167	0.154167	9.54943	29.9058	0.0103577	0.014853	0.00382062	0.0764686	12.0175	0.757968	36.9938	0.646621	30.1657	0.0800578	0.262607	0.0448676	0.262167	0.0998524	0.0101172	0.150438	0.0263927	0.222139	0.0471989	0.157037	0.0197945	0.152638	0.0318472
MS17-02	serpentine	none	61.8833	0.0011919	0.0661385	1.24667	3.10011	29.285	0.00629773	0.00179288	0.00291685	0.0270803	4.37942	0.904274	0.533084		12.2392	0.011331	0.0409734	0.00860584	0.0463759	0.0396825	0.000478102	0.0267737	0.00798431	0.0769745	0.0184069	0.0669343	0.00717153	0.0946642	0.0133391
MS17-02	actinolite	chlorite	46.9246	0.0195761	6.29585	8.7473	7.08326	24.825	0.275141	0.0297398	0.00774121	0.163	5.62453	0.778012	12.9289	0.245365	10.9847	0.395887	1.58072	0.328412	2.51499	1.18908	0.181665	2.11392	0.410987	2.88304	0.580383	1.84496	0.219413	1.87327	0.372766
MS17-02	actinolite	chlorite	52.3697	0.0337107	4.60255	8.87174	5.92575	23.2809	0.202952	0.0250811	0.011725	0.14667	4.52532	0.79711	11.7429	0.0572825	9.24146	0.983349	2.91186	0.45826	2.61113	0.969029	0.141297	1.59914	0.291186	1.84736	0.385702	1.26499	0.175189	1.53708	0.296437
MS17-02	actinolite	chlorite	46.3781	0.0389493	8.17244	8.02963	8.07458	22.4508	0.522394	0.0392391	0.263316	0.144726	5.88214	0.735479	13.5524	0.127054	11.3876	0.682328	2.0611	0.347752	1.87758	0.724679	0.164229	1.21878	0.199051	1.26584	0.255049	0.775971	0.102584	0.978787	0.194816
MS17-02	actinolite	chlorite	49.2164	0.112063	2.27573	10.8163	10.5666	22.642	0.129791	0.0171966	0.00566768	0.14675	4.05778	0.681811	58.0367	2.19197	36.4511	0.449425	2.16798	0.461416	3.27596	1.95214	0.212482	3.58773	0.701237	5.14656	1.15114	3.32392	0.450384	3.10808	0.477244
MS17-02	chlorite	actinolite	32.6938	0.0414276	15.3485	1.58244	9.9489	28.6245	0.00892057	0.0128043	0.00523594	0.106365	10.9317	0.742079	152.443	0.883729	53.0202	60.9773	481.632	110.024	715.82	256.281	15.4211	676.053	147.141	1193.03	296.049	888.147	113.117	724.658	122.396
MS17-04	actinolite	none	46.3151	0.00523132	0.119781	15.3816	11.7431	23.0844	0.0321868	0.00922333	0.00523435	0.43792	2.86544	0.662822	0.334626	0.369108	2.96742	0.00781926	0.0845549	0.0361823	0.437587	0.534235	0.0982508	1.25594	0.285573	1.84117	0.32297	0.772699	0.0852834	0.424474	0.0409904
MS17-04	actinolite	none	46.3603	0.00612393	0.118752	15.7135	11.0059	23.5633	0.0287169	0.00970745	0.0040972	0.360976	2.82769	0.681627	0.425125	0.553877	3.82853	0.0453304	0.276453	0.0673883	0.634043	0.611208	0.120007	1.3706	0.247787	1.69613	0.29783	0.796319	0.0976572	0.59809	0.079972
MS17-04	actinolite	none	45.7111	0.00844239	0.136005	15.1541	12.5576	22.9712	0.0409311	0.00894474	0.0043826	0.437313	2.96911	0.646552	0.484664	0.439545	3.24078	0.0600615	0.249852	0.0702982	0.636031	0.671447	0.127303	1.36278	0.281241	1.90421	0.327621	0.82815	0.108819	0.657377	0.0834942
MS17-04	actinolite	none	44.9341	0.00914507	0.185348	15.0111	13.3764	22.9429	0.0333407	0.00846376	0.00336947	0.412929	3.08196	0.6317	0.511238	0.0436127	14.2466	0.0494277	0.217094	0.0717186	0.662428	0.616877	0.138107	1.35345	0.311588	1.88988	0.339694	0.924104	0.093525	0.638199	0.0620269
MS17-04	actinolite	none	46.1339	0.00518567	0.135694	15.7725	12.8624	22.0125	0.0355828	0.00897551	0.00625169	0.312571	2.71426	0.631184	0.63722	0.442649	5.80304	0.00505884	0.0172195	0.011431	0.0938805	0.0642084	0.0119661	0.118688	0.0225216	0.144469	0.0235917	0.0546744	0.0107987	0.0846384	0.00724777
MS17-04	chlorite	none	18.6102	0.0827175	15.0235	0.0127811	35.0312	19.6911	0.00375267	0.00385648	0.0201354	0.242126	11.2765	0.359837	6.88478	4.27193	15.659	0.223134	0.540313	0.0749695	0.418321	0.173007	0.0510148	0.347344	0.0678718	0.37396	0.0652102	0.190751	0.0225352	0.150826	0.0162804
MS17-04	chlorite	none	21.5536	0.0215298	18.1429	0.0563202	25.6781	22.112	0.000536482	0.00334981	0.00689209	0.304553	12.1186	0.462691	5.96264	1.8279	37.6986	0.170047	0.382277	0.0613401	0.332186	0.169608	0.0311534	0.293079	0.0378762	0.303625	0.059231	0.170047	0.0172244	0.170047	0.0275943
MS17-28	actinolite	serpentine, chlorite	51.3909	0.0303757	3.94913	8.97146	4.20633	26.0326	0.0337923	0.0228036	0.00368849	0.167348	5.18602	0.860897	21.3319	0.194357	28.3467	0.312394	1.57903	0.388241	2.81581	1.53732	0.13131	2.2517	0.407676	2.80633	0.51244	1.29034	0.121829	0.524291	0.0527609
MS17-28	actinolite	serpentine, chlorite	49.2081	0.0208548	4.12693	6.8572	4.73347	28.2835	0.0221863	0.019937	0.00537681	0.137384	6.57641	0.856635	41.9433	0.429709	28.9576	0.262496	1.30127	0.292856	2.00375	0.878101	0.0840735	1.31248	0.218591	1.37787	0.268101	0.719762	0.0700612	0.348438	0.0424571
MS17-28	actinolite	serpentine, chlorite	53.8393	0.0249167	2.40152	10.2476	3.78506	25.207	0.0393546	0.0228593	0.00896845	0.149307	4.26938	0.869445	19.0973	0.51692	24.4572	0.287656	1.34064	0.328819	2.24477	1.02427	0.0823243	1.56033	0.280477	1.64649	0.321639	0.891687	0.0899345	0.453262	0.0505911
MS17-28	actinolite	serpentine, chlorite	50.9264	0.0229928	3.67503	7.83946	4.29388	27.2776	0.0256888	0.0269564	0.00351877	0.124953	5.77548	0.863995	38.8643	0.45695	26.7095	0.27841	1.27428	0.282179	1.84664	0.716046	0.0716046	1.10704	0.173358	1.12118	0.227062	0.630309	0.0730178	0.370271	0.0479562
MS17-28	actinolite	serpentine, chlorite	49.2698	0.0233206	4.29965	6.99953	4.51569	28.2044	0.0253654	0.0182557	0.00219036	0.126315	6.50652	0.86199	43.9845	0.350567	28.6052	0.309901	1.47191	0.314108	1.86969	0.797423	0.0799293	1.04703	0.191643	1.3401	0.243527	0.70908	0.0710015	0.390765	0.057493
MS17-28	actinolite	serpentine, chlorite	50.8994	0.0758083	3.18528	8.05669	4.35894	27.423	0.0271826	0.0176844	0.00318975	0.133489	5.81095	0.862848	40.9686	0.461485	24.2979	0.321627	1.49747	0.313622	1.91658	0.7299	0.0706355	1.0407	0.179414	1.19091	0.210965	0.65173	0.0805716	0.486443	0.0570735
MS17-28	actinolite	serpentine, chlorite	52.6839	0.0501197	2.44538	8.88877	3.96205	26.6876	0.0301441	0.0178	0.0047125	0.126244	5.09595	0.870731	35.1118	0.57887	22.1577	0.314582	1.54824	0.334036	2.13043	0.701286	0.0782897	1.11788	0.163697	1.10365	0.22965	0.653838	0.0896773	0.544707	0.0683256
MS17-28	actinolite	serpentine, chlorite	49.3091	0.174756	2.53699	6.88901	5.76773	28.3989	0.0221852	0.0172568	0.0364471	0.155955	6.68087	0.831188	53.2324	0.475872	25.7056	0.451612	2.03879	0.400759	2.54732	1.02173	0.078379	1.29232	0.212743	1.40429	0.278992	0.765594	0.0831377	0.385363	0.0461876
MS17-28	actinolite	serpentine, chlorite	48.492	0.0281329	5.21476	6.88269	4.38754	28.1726	0.0264317	0.0235926	0.00298693	0.11415	6.64616	0.865248	44.4789	0.499395	31.0593	0.294037	1.44965	0.29357	1.87623	0.687952	0.0645947	0.831703	0.140951	0.922248	0.184823	0.561936	0.0679551	0.391115	0.0461591
MS17-28	actinolite	serpentine, chlorite	50.7769	0.0300919	3.59472	8.10371	4.15606	27.355	0.0334525	0.0165124	0.0037804	0.128432	5.79321	0.868108	39.375	0.68765	27.2224	0.335347	1.55428	0.343825	2.16186	0.828947	0.0847787	1.09788	0.1851	1.19255	0.236909	0.714496	0.0781848	0.447914	0.0593451
MS17-28	actinolite	serpentine, chlorite	49.2906	0.0271548	4.1948	6.82194	4.48054	28.4264	0.0272863	0.0149604	0.00572903	0.124509	6.57634	0.863842	48.7621	1.10228	29.2375	0.310601	1.41055	0.267631	1.79355	0.659502	0.0546471	0.823443	0.141522	1.00186	0.210181	0.589442	0.067258	0.427369	0.0466602
MS17-28	actinolite	serpentine, chlorite	48.3719	0.118816	3.10615	7.80216	9.41078	25.0732	0.0290486	0.0192577	0.0523362	0.133137	5.86348	0.727097	102.587	1.79763	27.1282	0.469643	1.98116	0.377408	2.38586	0.837639	0.0790581	1.01646	0.162822	1.07293	0.230586	0.667759	0.0851757	0.494113	0.0677641
MS17-28	chlorite	serpentine, actinolite	38.8439	0.0181586	10.3324	1.73275	5.6871	32.5939	0.00749001	0.0515116	0.00551348	0.0894808	10.6252	0.851438	68.228	0.777451	48.1186	0.198384	0.831515	0.153256	0.87977	0.23815	0.0245746	0.328853	0.048747	0.325725	0.0674684	0.214022	0.0263618	0.167554	0.0243065
MS17-28	chlorite	serpentine, actinolite	38.7831	0.0216685	11.5563	2.27796	5.51959	31.4756	0.0108753	0.0479476	0.00342755	0.0832193	10.208	0.850803	65.4494	0.457876	47.8048	0.254974	1.07915	0.20784	1.2614	0.393684	0.0381564	0.526558	0.0821484	0.55035	0.113122	0.302558	0.0342958	0.245099	0.041972
MS17-28	chlorite	serpentine, actinolite	40.759	0.0241233	10.6114	3.3591	4.78233	30.8835	0.015282	0.0385589	0.00362401	0.0763515	9.43565	0.865913	58.4521	1.1455	47.5828	0.19967	0.91821	0.188803	1.17266	0.315125	0.0406584	0.400245	0.0629345	0.399793	0.0842145	0.300184	0.0449144	0.254002	0.0433297
MS17-28	chlorite	serpentine, actinolite	33.2354	0.129192	10.3039	1.54343	15.5403	28.9054	0.00617819	0.0092359	0.0022964	0.0767316	10.2048	0.650353	236.048	3.86383	58.8729	0.314132	1.07478	0.156169	0.888545	0.207327	0.0225278	0.249062	0.0399397	0.239189	0.0507099	0.145398	0.0228419	0.178607	0.0264769
MS17-28	chlorite	serpentine, actinolite	40.0493	0.0244996	11.3906	3.26656	5.16391	30.4389	0.0131105	0.0544633	0.0034322	0.0843772	9.50136	0.854958	49.6333	0.230747	49.1325	0.167405	0.756037	0.166952	1.18088	0.506739	0.0484117	0.746083	0.137091	0.721198	0.138448	0.432538	0.0422132	0.220341	0.0447921
MS17-28	actinolite	serpentine	57.2847	0.0374775	0.400231	11.4223	4.29943	23.3233	0.0660584	0.0258543	0.00567633	0.198123	2.93131	0.844352	18.8302	0.174714	21.7076	0.602276	2.51879	0.529964	3.77575	1.71802	0.153845	2.74203	0.4693	3.13028	0.58529	1.58941	0.179081	1.01916	0.125697
MS17-28	actinolite	serpentine	54.0139	0.0187639	0.572748	8.97539	4.68738	26.6077	0.0273142	0.011231	0.0122378	0.184366	4.87919	0.85022	48.6968	0.3852	24.7043	0.2354	1.05098	0.238253	1.64447	0.885959	0.0846488	1.33869	0.254897	1.67823	0.309111	0.77991	0.0891666	0.451302	0.0510746
MS17-28	actinolite	serpentine	54.9141	0.0369544	1.97655	10.6228	3.57	24.8164	0.0443101	0.0186154	0.00420608	0.135947	3.85521	0.874235	18.7953	0.663365	22.9768	0.369658	1.93049	0.440321	2.94669	1.16954	0.109119	1.7161	0.276883	1.79782	0.349468	0.998893	0.103975	0.534538	0.0554246
MS17-28	actinolite	serpentine	54.6114	0.0255934	1.56529	10.1141	3.7523	25.5347	0.0307136	0.0139461	0.00277885	0.137785	4.20512	0.871878	27.9703	0.279703	19.9714	0.288324	1.49861	0.351544	2.39951	1.01105	0.0775888	1.41288	0.241387	1.53741	0.292634	0.829051	0.0863534	0.43488	0.0488522
MS17-28	actinolite	serpentine	54.6593	0.0349927	1.85875	10.2249	3.77203	25.1461	0.0416762	0.0316409	0.00298622	0.145527	4.07651	0.869562	23.308	0.479589	23.5471	0.340508	1.7505	0.411967	2.78162	1.10306	0.107428	1.69487	0.29207	1.84066	0.377437	1.02009	0.101673	0.416763	0.0475752
MS17-28	actinolite	serpentine	51.5926	0.0189889	1.23952	6.83347	5.06988	28.7742	0.0241879	0.00841061	0.0035648	0.142936	6.27842	0.850199	70.5151	0.815258	21.1305	0.309704	1.55086	0.315795	2.085	0.799796	0.0684067	1.13855	0.177108	1.07764	0.224899	0.659703	0.0829314	0.571149	0.0946449
MS17-28	actinolite	serpentine	56.9223	0.0205733	0.563114	11.1173	3.43012	24.4907	0.0272606	0.0106097	0.00378976	0.139492	3.26931	0.877148	22.7788	0.34144	18.4209	0.251486	1.30579	0.313874	2.33592	1.13169	0.106398	1.66367	0.295496	1.89582	0.364171	0.943071	0.08802	0.409148	0.0432846
MS17-28	chlorite	serpentine	31.789	0.0733736	12.9863	0.185053	11.8817	31.319	0.00283447	0.00527174	0.0027243	0.0566992	11.6559	0.724966	221.196	16.8657	69.1785	0.170864	0.61105	0.0905095	0.486544	0.117883	0.00927171	0.132453	0.0160268	0.0966906	0.0251661	0.0609284	0.00975737	0.0830038	0.02106
MS17-28	chlorite	serpentine	28.7246	0.191286	11.8588	0.0535461	19.7019	28.3222	0.0023576	0.00854852	0.0550802	0.0693517	10.9455	0.58975	363.515	8.7119	71.4951	0.622914	1.93993	0.277197	1.36151	0.302558	0.0236262	0.324805	0.0413793	0.214015	0.0427141	0.129477	0.0184205	0.14683	0.0319466
MS17-28	chlorite	serpentine	30.9197	0.283298	12.5	0.165835	14.0019	30.3427	0.00222992	0.0187605	0.19211	0.0837027	11.4444	0.684247	242.961	6.75334	68.1028	0.862975	3.71743	0.367318	1.88084	0.362892	0.0283233	0.358467	0.0420424	0.231897	0.0438126	0.127897	0.0195608	0.153565	0.0328816
MS17-28	chlorite	serpentine	29.8189	0.137187	11.9062	0.0341317	17.6639	29.1006	0.00188277	0.0198892	0.0734694	0.066414	11.1206	0.62228	309.547	8.23385	70.2968	0.364617	1.13249	0.178533	0.857138	0.175425	0.015544	0.159437	0.0216283	0.103034	0.0200295	0.0666169	0.00910431	0.0759433	0.0210954
MS17-28	chlorite	serpentine	24.8845	0.290095	10.4844	0.00831721	29.362	24.6033	0.00143008	0.00748274	0.00241248	0.0779539	10.1655	0.45591	617.735	12.8527	80.4274	0.708354	1.86173	0.234174	0.951051	0.141761	0.0192005	0.158359	0.0179444	0.116638	0.0234174	0.0951051	0.010632	0.0951051	0.0181238
MS17-28	chlorite	serpentine	36.7725	0.0177208	12.4886	0.769665	5.53421	33.0078	0.00593201	0.0725776	0.00397861	0.0686507	11.2436	0.856411	80.4	0.621192	59.6299	0.143762	0.599007	0.100722	0.630066	0.158848	0.0254689	0.185026	0.0252914	0.202331	0.0434834	0.131338	0.0173934	0.10649	0.022496
MS17-28	chlorite	serpentine	32.7603	0.0267719	16.4923	0.00651403	5.74702	32.7419	0.00199727	0.0813538	0.00308829	0.0551491	12.0709	0.850684	70.2452	0.162645	67.993	0.107126	0.368809	0.0565742	0.289684	0.053629	0.00668165	0.0668165	0.00764873	0.0538488	0.0103302	0.035738	0.00496728	0.0531015	0.0167481
MS17-28	chlorite	serpentine	32.7968	0.0252034	16.3557	0.0066071	5.77118	32.8204	0.0017267	0.0643615	0.00324983	0.0557352	12.0864	0.850455	70.3647	0.241727	67.59	0.101394	0.357757	0.0539711	0.29227	0.0650467	0.00615306	0.100647	0.00843849	0.0558171	0.0109437	0.0329628	0.00588936	0.047906	0.0145915
MS17-28	chlorite	serpentine	33.2157	0.29786	15.702	0.0357386	5.91979	32.7375	0.00199887	0.0640986	0.00530172	0.0915221	11.9161	0.846865	68.2994	0.55485	66.7525	0.199922	0.568061	0.0845486	0.38179	0.0995208	0.00686957	0.104805	0.0115814	0.0700168	0.0139593	0.0378707	0.00713379	0.0783836	0.0147079
MS17-28	chlorite	serpentine	35.373	0.02699	14.7285	1.15568	5.68629	31.7379	0.00551678	0.0864476	0.00405455	0.0655469	11.1176	0.848058	67.5856	0.511002	58.7386	0.148857	0.59454	0.111976	0.699851	0.233284	0.0199513	0.289716	0.0391028	0.271053	0.0511891	0.180406	0.0217287	0.13997	0.0285717
MS17-28	chlorite	serpentine	34.3727	0.0687498	12.5237	0.672222	9.09545	31.7063	0.00420198	0.0185813	0.00425288	0.0621373	11.4467	0.777082	136.334	2.68241	59.1324	0.189451	0.658208	0.105349	0.588713	0.148728	0.0178827	0.149613	0.0228846	0.167318	0.0314275	0.11066	0.0155367	0.0991517	0.024965
MS17-28	chlorite	serpentine	33.7894	0.0433428	13.1588	0.0751429	8.28069	32.5695	0.0026679	0.00939937	0.00839761	0.0642543	11.9682	0.797292	165.443	2.50805	59.3086	0.192724	0.726013	0.107362	0.56145	0.152683	0.0120562	0.160603	0.0194044	0.102962	0.0220884	0.0677612	0.00941617	0.0880016	0.0237604
MS17-28	chlorite	serpentine	31.4358	0.0979293	12.6421	0.0668247	13.9899	30.1791	0.00242661	0.0118425	0.00356959	0.0613821	11.4684	0.683264	223.44	3.4423	65.876	0.255739	0.738899	0.103534	0.491125	0.103534	0.00743324	0.134064	0.0143798	0.077872	0.0183176	0.0548644	0.00561917	0.0553068	0.0142028
MS17-28	actinolite	none	58.804	0.0252197	0.155041	12.5195	3.4268	22.5175	0.0385556	0.0163081	0.00787416	0.171434	2.31507	0.867917	5.7486	0.634934	23.2477	0.312095	1.41151	0.370704	2.7351	1.67037	0.119661	2.10505	0.407823	2.58369	0.491341	1.31871	0.109404	0.561672	0.0229553
MS17-28	actinolite	none	56.498	0.0720314	0.255505	12.2152	5.49756	22.3242	0.0546666	0.0232087	0.0126191	0.15518	2.88411	0.802401	30.7833	0.194216	23.4315	0.565655	2.77729	0.627804	4.32617	1.74989	0.151003	2.47626	0.420964	2.83556	0.548176	1.46342	0.14304	0.682671	0.0724913
MS17-28	actinolite	none	57.6672	0.0331186	0.300522	12.6622	3.20449	23.3002	0.0435336	0.0210099	0.0146408	0.149324	2.60048	0.879097	8.76566	0.26297	25.4342	0.44851	2.23768	0.478703	3.20434	1.19797	0.127102	1.74826	0.292189	1.92845	0.392994	1.16145	0.131875	0.764074	0.088728
MS17-28	actinolite	none	56.7097	0.0390692	0.866561	11.8974	3.68673	23.5266	0.0542282	0.0210283	0.0288562	0.168272	2.99725	0.864525	11.8581	0.455893	24.244	0.492753	2.35706	0.544162	3.76354	1.64703	0.147923	2.45891	0.436493	2.81296	0.562106	1.43994	0.143558	0.710514	0.0858437
MS17-28	actinolite	none	57.554	0.0195898	0.206648	12.0538	3.50279	23.5824	0.0314436	0.0157832	0.00514813	0.236017	2.78986	0.870675	8.53483	0.5152	22.8528	0.306204	1.11157	0.224064	1.53588	0.758219	0.0385914	1.08046	0.201706	1.29869	0.241561	0.642542	0.0793214	0.535128	0.0850567
MS17-28	serpentine	none	43.3567	0.0101257	1.57645	0.187167	7.26304	36.2747	0.00197257	0.00306524	0.0211327	0.168507	11.1256	0.833179	59.4004	3.50564	32.1404	0.231044	0.804654	0.119521	0.618042	0.150178	0.0131961	0.190167	0.0259924	0.161286	0.0332347	0.0965496	0.0136405	0.115522	0.0267033
MS17-28	serpentine	none	36.2484	0.0144014	1.81378	0.0106099	21.7483	30.7111	0.00378029	0.00393947	0.00388308	0.127774	9.26811	0.585426	252.107	1.47818	1027.94	0.539128	2.05857	0.32919	1.51446	0.37816	0.0274778	0.339619	0.0457057	0.29609	0.0621199	0.205857	0.0246212	0.195882	0.0598527
MS17-28	serpentine	chlorite, actinolite	42.2896	0.0117396	5.4704	1.91688	5.99322	33.8298	0.00864743	0.022742	0.00246898	0.12431	10.321	0.849504	48.6907	0.0582854	37.0319	0.263181	1.00968	0.156474	0.94243	0.264974	0.0257352	0.373475	0.0632172	0.378407	0.0775644	0.212966	0.0201757	0.172614	0.0336262
MS17-28	serpentine	chlorite	41.1221	0.0141091	4.67647	0.00657632	7.53046	35.2068	0.00293462	0.00289337	0.00268716	0.123112	11.29	0.823797	118.044	0.993308	87.7915	0.384907	1.49617	0.229259	1.17512	0.282029	0.0248327	0.308192	0.0400871	0.240789	0.0466057	0.145892	0.0241675	0.209304	0.0461622
MS17-31	chlorite	serpentine	32.1646	0.0120264	17.0603	0.00186187	2.77483	35.3042	0.00254366	0.000507139	0.00654664	0.0162303	12.5949	0.92713	333.652	11.3372	17.9924	0.0528429	0.22622	0.0497858	0.342387	0.177307	0.00484757	0.211371	0.0394793	0.291291	0.0724952	0.253296	0.0493491	0.432351	0.0589569
MS17-31	chlorite	serpentine	33.1135	0.0182039	16.5545	0.00198178	3.2958	34.6517	0.00225355		0.00902776	0.0258332	12.2567	0.913148	381.377	9.82374	27.0724	0.208223	1.31509	0.136331	0.714533	0.320444	0.0477817	0.539188	0.114413	1.03454	0.336664	1.60003	0.26258	1.99456	0.307732
MS17-31	chlorite	serpentine	28.1226	1.34866	15.4505	3.23741	3.65316	32.3501	0.00218858	0.000277131	3.93146	0.172292	11.625	0.898533	545.059	33.9393	22.5079	2.86873	10.9453	1.86247	11.0336	2.46711	0.0781178	2.64365	0.315119	1.40789	0.251566	0.653188	0.0714976	0.448405	0.0706149
MS17-31	chlorite	serpentine	33.2894	0.0104872	16.5837	0.00222093	2.65766	35.0809	0.00157642	5.62365e-05	0.00932534	0.0165668	12.2713	0.929577	422.043	9.78633	16.9164	0.0385668	0.172236	0.0308534	0.269529	0.123151	0.00433876	0.170483	0.028706	0.195025	0.051101	0.142872	0.0181878	0.10562	0.0233154
MS17-31	chlorite	serpentine	33.777	0.00687435	16.5685	0.0019773	2.68439	34.7831	0.0016921		0.0106379	0.0188176	12.071	0.928354	408.472	20.6323	18.0973	0.0571044	0.203379	0.044805	0.311878	0.156378	0.00399731	0.167799	0.0303532	0.267512	0.0557866	0.126069	0.0192837	0.12519	0.0241595
MS17-31	chlorite	serpentine	33.4613	0.0105544	16.6397	0.0052527	2.61504	34.9638	0.0141272	9.42116e-05	0.0120977	0.0183186	12.1959	0.930412	341.748	17.5349	13.9943	0.0535216	0.236021	0.0434314	0.447476	0.149159	0.00149159	0.205312	0.0320691	0.372896	0.0561538	0.170216	0.0220667	0.163197	0.0282085
MS17-31	chlorite	serpentine	32.488	0.00890469	16.9736	0.00233746	3.10753	34.8785	0.000911006	0.000457356	0.00160091	0.0218939	12.4314	0.918193	462.789	14.4917	23.9698	0.0310567	0.174093	0.0328064	0.272949	0.0608012	0.00874837	0.136912	0.025239	0.150909	0.0367432	0.0712992	0.0107605	0.090983	0.0170156
MS17-31	chlorite	serpentine	33.5243	0.0224033	17.8999	0.00288346	2.75	33.9122	0.00440458	0.00296381	0.00897816	0.0155404	11.8289	0.924991	147.729	7.55391	20.5898	0.0130893	0.0912286	0.0186424	0.10445	0.0418682	0.00158658	0.068752	0.012869	0.0771256	0.0175406	0.0696334	0.00665484	0.0810921	0.00991615
MS17-31	chlorite	serpentine	29.4138	0.0138076	16.2508	0.00131786	8.44662	33.3223	0.0024744	0.000861283		0.0197689	12.421	0.797778	590.872	10.7546	22.9169	0.0594808	0.262853	0.0607928	0.440857	0.153513	0.0166196	0.266351	0.0402807	0.289531	0.0568566	0.179754	0.0240547	0.155262	0.0267663
MS17-31	chlorite	serpentine	32.7598	0.0199254	16.9058	0.00470332	2.86657	34.9672	0.00486151	0.000329284	0.013476	0.0186464	12.3724	0.924232	355.937	17.1314	15.6732	0.0490344	0.226346	0.0424672	0.390961	0.129153	0.0117332	0.218028	0.0331857	0.211023	0.0525368	0.13572	0.0250863	0.15367	0.0254803
MS17-31	chlorite	serpentine	31.5777	0.0167933	16.3864	0.00433739	5.20343	34.1828	0.0012546		0.0102159	0.0175352	12.5245	0.867887	409.471	12.625	21.2377	0.0326004	0.122798	0.0240351	0.210635	0.0917705	0.00445742	0.123235	0.0196214	0.159943	0.026089	0.108377	0.00983255	0.118865	0.0235107
MS17-31	chlorite	serpentine	31.2133	0.307894	17.0658	0.151078	3.8857	34.49	0.001485	0.000421835	0.197278	0.0542594	12.5547	0.898746	418.926	19.876	19.3077	0.160756	0.620307	0.126682	0.864936	0.259044	0.0157261	0.327627	0.0546045	0.354711	0.0829989	0.243755	0.0345101	0.244628	0.0471783
MS17-31	chlorite	serpentine	32.2419	0.0133879	16.9162	0.0822459	2.6894	35.2892	0.00175742	0.000245102	0.115705	0.0146541	12.5543	0.929186	433.766	22.112	14.2402	0.112264	0.463033	0.0869279	0.559134	0.197444	0.00777546	0.30665	0.044687	0.300098	0.0698918	0.223217	0.0401878	0.358195	0.0851806
MS17-31	actinolite	none	4.26053	0.00270765	3.33044	47.3741	2.35727	37.9793	0.00240284	0.0044384		0.887206	3.70364	0.94156	442.512	5.6276	48.0962	16.3537	64.4529	12.5058	41.8463	4.71372	0.0442512	4.28083	0.904265	2.88595	0.683008	2.06826	0.351124	4.04033	0.658959
MS17-36	chlorite	serpentine	32.346	0.0467125	16.628	0.00677017	4.79703	33.7608	0.00284337	0.0119759		0.0311111	12.3297	0.875589	217.632	0.315473	48.019	0.0332999	0.142839	0.0214697	0.148097	0.0214697	0.00179644	0.0556459	0.00639709	0.0517025	0.00547696	0.0262894	0.00258512	0.044692	0.00552077
MS17-36	chlorite	serpentine	32.9221	0.0329884	14.0598	0.0053834	4.42511	35.8933	0.00466777	0.00786041		0.0317944	12.5482	0.890246	384.049		49.1062	0.117967	0.426866	0.0541775	0.280063	0.0729649	0.00563621	0.117093	0.0135444	0.0917522	0.0139813	0.0655373	0.0170397	0.0703434	0.00869462
MS17-36	chlorite	serpentine	32.4227	0.0413369	13.9267	0.00568345	8.18949	33.1497	0.00226783	0.00486561	0.00635605	0.0316056	12.1401	0.801895	442.415	1.03581	48.3642	0.0689078	0.27212	0.0531073	0.245786	0.0741747	0.00307232	0.0886585	0.0123332	0.086464	0.0190484	0.0289676	0.0086464	0.0671522	0.0139571
MS17-36	chlorite	serpentine	35.3601	0.0331428	12.3213	0.00679969	5.06115	34.9607	0.00257356	0.00643143	0.00242427	0.0417683	12.1422	0.87354	342.406	0.636524	40.1209	0.11633	0.43108	0.072871	0.392011	0.100088	0.00746269	0.205882	0.0199298	0.105795	0.0359965	0.0847235	0.0103161	0.101405	0.0151449
MS17-36	chlorite	serpentine	30.1707	0.0439944	15.2032	0.00451907	11.5217	30.9173	0.00235747	0.0108392	0.0068357	0.0304119	12	0.728511	491.867	0.980218	52.6557	0.06989	0.257582	0.0509889	0.171428	0.0584615	0.00650549	0.0830768	0.0120879	0.0795603	0.0182857	0.0399999	0.00610988	0.0417582	0.0133187
MS17-36	chlorite	serpentine	33.1378	0.0388894	12.586	0.0182067	8.10108	33.8809	0.00270416	0.00625116	0.0159744	0.0340228	12.1018	0.807034	425.936	0.733312	44.4353	0.106704	0.391685	0.0693792	0.324941	0.0917738	0.00509367	0.109338	0.0198038	0.135685	0.0240632	0.0865045	0.0107143	0.0987996	0.0189256
MS17-36	chlorite	serpentine	29.8801	0.108344	11.9161	0.00942016	15.3641	31.106	0.00495196	0.00513185	0.00142439	0.0412108	11.4349	0.669377	716.339	1.12757	54.6502	0.158744	0.503206	0.0809197	0.362591	0.0981649	0.00565996	0.165377	0.0230378	0.134424	0.0263542	0.074287	0.00848994	0.0592527	0.0141499
MS17-36	chlorite	serpentine	28.6732	0.860812	11.4602	0.00941475	17.0715	30.483	0.00574569	0.00594177	0.000215012	0.12461	11.1489	0.641013	873.642	0.988945	59.7756	0.22351	0.864773	0.12639	0.625297	0.168076	0.00886946	0.257658	0.0308214	0.213754	0.0514429	0.125946	0.0172511	0.164529	0.0286484
MS17-36	serpentine	none	42.851	0.0178098	1.88678	0.00482079	4.76106	38.5637	0.00174839	0.00279664	0.000252471	0.0943276	11.7814	0.890108	189.332	0.260144	30.1579	0.295418	1.01412	0.144181	0.716057	0.206792	0.00595244	0.265876	0.0432103	0.303795	0.0585544	0.187392	0.0270285	0.177251	0.0318786
MS17-36	serpentine	none	42.6423	0.0268173	2.4953	0.99572	8.65512	33.6491	1.43221	0.0977297	0.365442	0.0540251	9.50249	0.795408	461.11	0.763997	43.4866	0.85215	3.4086	0.485974	2.47734	0.64239	0.0394656	0.894645	0.127031	0.814628	0.16609	0.480549	0.0613458	0.485974	0.0876562
MS17-36	serpentine	chlorite	43.5288	0.0323305	2.97202	0.0328842	5.39265	36.778	0.00222178	0.00339483	0.0125901	0.065027	11.0847	0.872123	528.479	0.71056	46.9829	0.41701	1.88742	0.285112	1.75419	0.499168	0.0217609	0.688355	0.0972578	0.648386	0.135895	0.47874	0.0617299	0.408572	0.0928169
MS17-36	serpentine	chlorite	38.3843	0.0307842	2.64111	0.0315334	12.6847	35.2282	0.00229782	0.00110342	0.00583887	0.0569247	10.8216	0.735255	618.123	0.917387	53.2583	0.687595	2.81896	0.425294	2.16432	0.591403	0.034736	0.997547	0.152304	0.930747	0.219549	0.549987	0.0792694	0.543307	0.102872
MS17-36	serpentine	chlorite	47.381	0.0177713	2.05695	0.0128767	4.88683	35.6256	0.00479201	0.00412216	0.00383212	0.11368	9.83072	0.879374	342.859	1.57688	31.8967	0.245092	1.07678	0.159941	0.716354	0.267619	0.00792945	0.270773	0.0423505	0.283838	0.0540645	0.187874	0.0154985	0.139216	0.0378451
MS17-36	serpentine	chlorite	42.6508	0.0515501	2.44494	0.0244098	5.33518	37.6893	0.0110192	0.0101352	0.00534565	0.101945	11.5794	0.875997	533.039	1.02457	43.6299	0.45178	1.75766	0.229644	1.42644	0.310461	0.0141319	0.499034	0.053878	0.490202	0.0887663	0.288822	0.0490202	0.318852	0.0812587
MS17-36	serpentine	chlorite	47.8795	0.0322951	2.83348	0.0358578	5.1686	34.5158	0.000905127	0.00283094	0.018721	0.0664691	9.37239	0.869758	402.967	3.62218	47.0855	0.525216	2.12803	0.289774	1.61187	0.19922		0.629354	0.0819518		0.081499		0.0339579	0.0996099
MS17-36	serpentine	chlorite	40.2664	0.0363127	3.57441	0.11325	6.44143	37.5798	0.0799266	0.00804937	0.0498209	0.0610283	11.6967	0.853674	513.825	0.458694	46.6605	0.542935	2.35522	0.396947	2.15674	0.663783	0.0354165	1.04088	0.157897	0.953995	0.200238	0.611298	0.07714	0.600713	0.120407
MS17-36	serpentine	chlorite	37.7971	0.022886	3.15991	3.28805	5.65999	35.1288	0.406089	0.0293717	3.52261	0.0607991	10.787	0.861236	741.554	0.797226	47.3853	4.63193	15.5882	2.20462	10.8227	2.28033	0.0988738	2.60991	0.316664	1.66571	0.311764	0.811033	0.0926386	0.635999	0.120697
MS17-36	serpentine	chlorite	40.3308	0.0375816	2.33866	0.0303363	9.56846	36.2957	0.00698889	0.00240732	0.00786313	0.0712284	11.2104	0.791374	552.982		43.633	0.476709	1.96759	0.309528	1.66737	0.4807	0.0310858	0.762734	0.115607	0.699321	0.145008	0.407974	0.0593336	0.411078	0.083812
MS17-36	serpentine	chlorite	42.4357	0.0208304	2.51507	0.675863	5.11687	36.7755	0.276764	0.0223426	0.636424	0.0588732	11.3944	0.877857	390.436		43.3794	1.14652	5.00218	0.647185	3.35102	0.844616	0.0461706	1.17751	0.158476	0.95617	0.210711	0.576358	0.0650726	0.566176	0.109782
MS17-36	serpentine	chlorite	41.9425	0.0244476	6.64989	0.337434	4.32591	34.8201	0.672637	0.0511333	0.00303281	0.0570878	11.0483	0.889493	372.869	0.395535	40.5291	0.473308	1.9599	0.311983	1.6088	0.448421	0.0248876	0.702185	0.114216	0.73685	0.167102	0.462642	0.0679964	0.464864	0.0946617
MS17-36	serpentine	chlorite	41.1481	0.0309152	2.60776	1.91089	4.23902	36.5527	0.0860848	0.00810978	2.06953	0.0559941	11.2217	0.896081	370.449		47.013	2.88305	9.04833	1.29515	6.4802	1.3883	0.0572174	1.64555	0.218224	1.29515	0.239515	0.603666	0.0803705	0.557537	0.110886
MS17-37	chlorite	serpentine	34.6345	0.0328677	13.2753	0.0114401	4.11059	35.4782	0.00291904	0.0222333	0.010203	0.0286294	12.3526	0.896168	225.106	2.39166	32.3825	0.0841025	0.319765	0.0446795	0.264572	0.0639529	0.00267201	0.0744658	0.0137543	0.0994337	0.0221207	0.0731517	0.0090673	0.0749038	0.0186602
MS17-37	chlorite	serpentine	32.9396	0.0396841	12.3987	0.00465372	9.07281	33.4228	0.00320274	0.0252167	0.0026994	0.0327059	11.9865	0.7865	395.739	4.36193	35.1752	0.105091	0.385626	0.0605481	0.284932	0.10641	0.00285812	0.118282	0.0222933	0.130594	0.031923	0.0835449	0.0131034	0.125757	0.0251075
MS17-37	chlorite	serpentine	34.6063	0.276598	13.3057	0.00681317	4.63066	34.8189	0.00814486	0.0903225	0.00213162	0.0530555	12.1689	0.882618	180.865	0.539961	31.6501	0.165061	0.403874	0.0484648	0.217741	0.0697999	0.00250226	0.0926275	0.0153648	0.0961395	0.0259445	0.0750678	0.010448	0.101407	0.0220374
MS17-37	chlorite	serpentine	34.4822	0.434249	13.3814	0.00506337	4.46061	34.801	0.00630132	0.172425	0.00208704	0.0693077	12.1535	0.886388	176.99	0.491762	32.4023	0.135674	0.336769	0.0394727	0.172995	0.0443464	0.0024149	0.0474199	0.00939617	0.0785941	0.0156749	0.0450489	0.009001	0.0698127	0.0123819
MS17-37	chlorite	serpentine	32.1781	0.0991125	12.0652	0.00519859	10.8369	32.8497	0.00421757	0.0209736	0.00194758	0.0387477	11.823	0.751939	425.964	3.91605	34.8421	0.112328	0.409225	0.0620225	0.305267	0.101756	0.00251085	0.117173	0.0194701	0.151532	0.0326852	0.118495	0.0154616	0.119816	0.0266062
MS17-37	chlorite	serpentine	33.2002	0.0258499	15.7768	0.00510313	4.57229	34.1003	0.00409839	0.0025706	0.00296971	0.0319827	12.2372	0.881769	226.498	1.01758	33.9908	0.0813183	0.318431	0.0474138	0.241674	0.069739	0.00320185	0.10746	0.0174567	0.0973715	0.0239043	0.0771954	0.0104828	0.0785112	0.018948
MS17-37	chlorite	serpentine	34.4684	0.139764	13.4354	0.00579406	4.34585	35.2012	0.00462636	0.0171676	0.0019939	0.0435861	12.2905	0.890109	253.568	1.65685	31.7462	0.117031	0.40676	0.0546584	0.287537	0.0902938	0.00350655	0.157357	0.0201189	0.151658	0.0300249	0.0986218	0.0140262	0.115716	0.0242391
MS17-37	chlorite	serpentine	34.5927	2.21192	10.902	0.00480808	5.79385	34.47	0.00346593	0.0191969	0.00270517	0.272481	11.6785	0.856103	267.644	2.52902	29.0981	0.241868	0.735315	0.0948935	0.4268	0.135499	0.00617911	0.155802	0.0244075	0.167719	0.0311163	0.133292	0.0195525	0.121817	0.0272764
MS17-37	chlorite	serpentine	37.0238	0.029159	10.2979	0.00607831	4.45205	36.0028	0.00409445	0.0158343	0.00283579	0.0445379	12.0746	0.88995	256.036	2.60561	29.1308	0.151152	0.605047	0.0883185	0.391941	0.155107	0.0058879	0.176637	0.0333062	0.180591	0.0427092	0.126106	0.0164334	0.172243	0.0338774
MS17-37	chlorite	serpentine	35.7089	0.0263135	11.3988	0.00627118	5.12181	35.4024	0.00359465	0.00733941	0.00177876	0.0386994	12.2276	0.873611	312.181	3.28935	28.9847	0.105698	0.41709	0.0581118	0.331128	0.105259	0.00324549	0.137714	0.0218851	0.122364	0.0276305	0.0789444	0.0128943	0.102189	0.0173678
MS17-37	chlorite	serpentine	34.4322	0.0773265	13.765	0.00325433	4.22533	35.0708	0.00360933	0.0786226	0.00202869	0.0320785	12.2766	0.892475	183.799	1.13559	35.776	0.06796	0.247725	0.0338484	0.185026	0.0473527	0.00254302	0.0828673	0.0107421	0.0850596	0.0209141	0.0762905	0.0105667	0.0898825	0.0227995
MS17-37	chlorite	serpentine	30.6746	0.026419	10.9731	5.01589	5.90321	30.4946	0.00617574	0.007937	5.81621	0.0338823	10.9767	0.837814	285.981	1.94805	32.9998	9.38444	40.9179	7.56092	45.8103	15.3887	0.63156	19.436	2.71749	15.4332	2.89094	7.02721	0.676036	3.3357	0.338018
MS17-37	serpentine	chlorite	38.3875	0.025743	8.18337	0.00475803	4.2305	36.9421	0.0032293	0.0321002	0.00199443	0.0508009	12.0986	0.89725	217.459	1.7836	26.4456	0.182314	0.633925	0.10192	0.458201	0.158591	0.00799545	0.195932	0.0332558	0.194614	0.0441507	0.145851	0.0214823	0.152001	0.0276765
MS17-37	serpentine	chlorite	40.307	0.0309276	2.59362	0.0494323	8.13264	37.2116	0.00174619	0.0024059	0.0336793	0.0672087	11.4959	0.820647	406.337	1.38393	29.7557	0.515548	2.20191	0.345762	1.94104	0.534561	0.0307737	0.801178	0.132822	0.876786	0.200295	0.637582	0.0918348	0.69683	0.146352
MS17-37	serpentine	chlorite	38.3413	0.0333359	5.04094	0.279621	7.39015	36.7788	0.00197633	0.00611005	0.295724	0.0650303	11.6997	0.832684	368.373	1.7426	29.0276	0.752628	3.06169	0.476458	2.43082	0.652924	0.032558	0.813067	0.134114	0.810862	0.199848	0.584103	0.0807332	0.633513	0.132085
MS17-37	serpentine	chlorite	40.789	0.0257631	3.15964	0.0961782	5.87499	37.9727	0.00171053	0.00264254	0.0950364	0.073244	11.8482	0.866014	333.865	1.63409	30.8306	0.554973	2.16704	0.335186	1.79705	0.538676	0.0267796	0.744809	0.112316	0.801627	0.182348	0.572591	0.078445	0.625446	0.127732
MS17-37	serpentine	chlorite	39.2042	0.024166	5.4418	0.0666707	6.87274	36.4366	0.00189482	0.00512168	0.0644657	0.0688247	11.7553	0.84131	319.676	2.16498	28.88	0.457247	1.88719	0.281756	1.39776	0.446224	0.0226639	0.579826	0.10891	0.721366	0.154326	0.460334	0.0731066	0.513246	0.10406
MS17-37	serpentine	chlorite	39.1788	0.328421	3.16815	0.0267791	8.91817	36.7774	0.00161461	0.00486465	0.0155289	0.0949466	11.4095	0.804835	416.904	2.47399	30.3151	0.490814	1.89864	0.292984	1.5313	0.482848	0.0227483	0.724936	0.130117	0.829826	0.188536	0.642174	0.0709446	0.626242	0.124186
MS17-37	serpentine	chlorite	39.9553	0.0300658	4.8314	0.0246964	6.35562	36.8404	0.00231004	0.00323762	0.0169067	0.0675265	11.8091	0.852865	350.306	2.24725	26.2831	0.35251	1.42238	0.220759	1.09586	0.352069	0.0189033	0.480735	0.0755252	0.498361	0.116637	0.37322	0.0485141	0.414639	0.0811213
MS17-37	serpentine	chlorite	38.8286	0.0286124	2.23955	1.6127	9.21207	35.1243	0.00212256	0.00195689	1.91336	0.0752314	10.8805	0.792223	438.515	2.40404	28.4023	2.09241	6.81145	0.966068	5.03068	1.05066	0.0440741	1.20202	0.160269	0.899289	0.180303	0.539128	0.0685152	0.532005	0.109295
MS17-37	serpentine	chlorite	40.1994	0.0357351	2.30619	0.610009	7.79665	36.8536	0.00198471	0.00225574	0.671787	0.0666167	11.3868	0.825384	376.756	1.03154	28.6342	1.04039	3.92251	0.604757	3.03707	0.798226	0.0386496	1.03597	0.150525	0.984612	0.208522	0.637961	0.0809294	0.658769	0.142999
MS17-37	serpentine	chlorite	42.3947	0.0271079	2.24939	0.10967	5.21391	38.038	0.0017792	0.00214139	0.104	0.0706641	11.7321	0.879453	309.622	0.692459	28.6191	0.614833	2.41258	0.382837	1.95829	0.595868	0.0320207	0.878144	0.128348	0.903726	0.196711	0.64262	0.0821689	0.652764	0.138492
MS17-45	chlorite	serpentine	38.0874	0.0267891	10.4491	0.00554293	5.29919	34.5572	0.000866417	0.0202248	0.00711974	0.0554729	11.4707	0.867043	109.441	2.69509	33.3664	0.169052	0.637706	0.108423	0.628413	0.324385	0.00862961	0.501403	0.0858536	0.583716	0.124797	0.378818	0.0491224	0.42263	0.0659391
MS17-45	chlorite	serpentine	36.6486	0.0486823	11.783	0.00408706	5.86711	33.7489	0.00157154	0.16974	0.00190409	0.0814044	11.6275	0.851901	95.1142	0.905639	38.8743	0.179802	0.601698	0.0927728	0.510692	0.216912	0.00468282	0.369324	0.0636156	0.348561	0.0874715	0.250486	0.0327797	0.226189	0.0494788
MS17-45	chlorite	serpentine	34.3921	0.0286418	13.3054	0.00764832	6.19461	33.7903	0.00133824	0.087149	0.00729476	0.0362344	12.1322	0.845076	93.6049	1.59888	86.0843	0.0672058	0.224459	0.0379515	0.238075	0.0922433	0.00412898	0.147589	0.0227533	0.140122	0.0302206	0.101468	0.0136169	0.118598	0.0226216
MS17-45	chlorite	serpentine	34.382	0.0379097	13.3622	0.00348571	5.3657	34.4333	0.00116777	0.0944804	0.0028176	0.0487479	12.2474	0.86518	114.183	2.30296	45.267	0.057903	0.191255	0.027153	0.195203	0.0767653	0.00381633	0.131159	0.0209679	0.144319	0.0298288	0.0881705	0.0131598	0.0855385	0.0198274
MS17-45	chlorite	serpentine	32.635	0.0514304	16.739	0.00597681	6.07536	32.2789	0.00278651	0.133509	0.00540131	0.0542684	12.0007	0.841599	97.7036	0.629069	48.3869	0.057584	0.186521	0.0291219	0.169805	0.0690656	0.00290339	0.113936	0.0161886	0.125814	0.0254267	0.0730248	0.0109977	0.0897413	0.0189161
MS17-45	chlorite	serpentine	32.668	0.0615192	16.2453	0.003141	6.36835	32.1597	0.00147701	0.322843	0.00290461	0.0872526	12.0627	0.834709	93.6793	0.259365	50.2873	0.0465978	0.138035	0.0185952	0.128803	0.045279	0.0043081	0.0786888	0.00804472	0.0927561	0.0209251	0.034289	0.0105505	0.0747324	0.0106823
MS17-45	chlorite	serpentine	32.9431	0.0557435	15.5818	0.00249948	5.99305	33.0433	0.00110022	0.117888	0.00400541	0.0675065	12.1705	0.846475	107.875	0.684918	47.4146	0.0829805	0.230501	0.0342459	0.20328	0.0943958	0.00386364	0.15718	0.0230062	0.13874	0.0311726	0.0987863	0.0137423	0.118983	0.0230062
MS17-45	chlorite	serpentine	33.8842	0.0726608	15.2578	0.00186168	5.53662	33.2125	0.000802829	0.0267126	0.00736852	0.0433585	11.9299	0.857116	137.348	11.0495	50.6219	0.0493045	0.213946	0.0338969	0.208224	0.0721959	0.000528263	0.138669	0.0228033	0.138669	0.0320039	0.108734	0.0170365	0.106093	0.0254887
MS17-45	chlorite	serpentine	34.4988	0.0345414	14.6707	0.00332832	5.36423	33.4539	0.000763044	0.0339965	0.00485979	0.038679	11.8676	0.861811	147.001	15.0658	48.2779	0.0444043	0.175767	0.0311447	0.179732	0.0753288	0.00374441	0.124667	0.0213652	0.155063	0.0325103	0.11057	0.0143169	0.126429	0.0279289
MS17-45	serpentine	none	41.5904	0.00653491	0.613487	0.00371325	6.49067	39.4281	0.00111777	0.00138177	0.0028737	0.0778211	11.768	0.858649	86.5841	0.427848	112.9	0.14688	0.546058	0.0886572	0.491364	0.212601	0.00555762	0.361686	0.0626334	0.344043	0.0674853	0.209513	0.0340073	0.252298	0.0480778
MS17-45	serpentine	none	43.8991	0.0079246	0.895119	0.0277084	4.57259	38.8264	0.00746892	0.000897333	0.0340942	0.0707604	11.6435	0.894638	77.9177	0.375454	15.0179	0.279602	0.926266	0.15239	0.852942	0.339675	0.0151507	0.516359	0.0848083	0.541095	0.123237	0.356018	0.0533586	0.416974	0.0803912
MS17-45	serpentine	none	44.2124	0.00475766	0.580502	0.00494502	7.13915	36.8244	0.000572524	0.00027137	0.00523351	0.081326	11.1333	0.837612	71.7936	0.813009	59.5273	0.10307	0.355858	0.0526457	0.334089	0.121729	0.010929	0.235462	0.0350083	0.272336	0.0581102	0.167933	0.0211027	0.161713	0.0265228
MS17-45	serpentine	none	40.194	0.0112362	0.901937	0.0428526	10.5392	37.0917	0.00122207	0.000724274	0.0518843	0.0664622	11.0682	0.778732	166.378	0.644533	14.4462	0.544075	1.72913	0.260925	1.4802	0.488067	0.0169801	0.809	0.128018	0.70632	0.164912	0.492068	0.0617863	0.480955	0.0955687
MS17-45	serpentine	none	42.9829	0.00871444	0.792723	0.00626944	4.85843	39.3154	0.00157907	0.000940325	0.00727512	0.0719169	11.9391	0.890016	79.0655	0.519472	29.9346	0.315205	1.01825	0.15188	0.928887	0.353065	0.0141314	0.539283	0.0862852	0.582425	0.132509	0.372435	0.0576702	0.383881	0.0792856
MS17-45	serpentine	none	45.0856	0.00813878	0.885861	0.00460035	4.04408	38.6176	0.000599458	0.000773066	0.00789665	0.0651484	11.2675	0.905206	64.2335	0.829535	14.9047	0.352663	1.11122	0.173005	0.981247	0.359761	0.0130419	0.574908	0.0949307	0.617493	0.12199	0.365084	0.0516796	0.38061	0.0714642
MS17-45	serpentine	none	41.6596	0.0105252	0.92728	0.121256	9.69581	36.2967	0.00158427	0.00108262	0.135891	0.0667608	11.0523	0.789187	168.052	3.16542	33.7868	0.498376	1.72942	0.27164	1.44489	0.478815	0.0288978	0.692659	0.107589	0.671763	0.129818	0.388565	0.0560173	0.438802	0.0866935
MS17-45	serpentine	none	44.1985	0.00866794	0.893221	0.0113179	6.0883	37.4467	0.0016864	0.00106274	0.0128548	0.0673881	11.2509	0.860151	104.834	0.661036	25.7308	0.306117	1.05677	0.168586	0.939203	0.344715	0.0105145	0.603362	0.104257	0.626875	0.141967	0.384199	0.059582	0.467605	0.0927225
MS17-45	serpentine	none	45.2414	0.0101601	0.963448	0.0365453	3.94106	38.5056	0.00323571	0.00201258	0.0382869	0.0641584	11.1807	0.907153	70.1566	0.319701	11.9886	0.600327	1.88712	0.27219	1.5985	0.614092	0.0239776	0.861416	0.14875	0.834775	0.173615	0.515074	0.0732648	0.510633	0.0928021
MS17-45	serpentine	none	41.95	0.0101733	0.994882	0.0144875	4.81863	40.0453	0.00149751	0.00210239	0.0114369	0.0701001	12.0624	0.892595	100.007	0.501136	19.3416	0.479596	1.67045	0.280021	1.62649	0.682688	0.0229468	1.05942	0.185508	1.14734	0.243974	0.733681	0.105502	0.732801	0.152978
MS17-45	serpentine	none	44.6148	0.0114806	0.857498	0.015758	4.48212	38.536	0.00295193	0.00199727	0.0163453	0.0677939	11.3771	0.895808	84.9739	1.61707	38.985	0.415566	1.31847	0.206011	1.16651	0.459869	0.0166138	0.746955	0.108145	0.746069	0.151961	0.428857	0.0636639	0.461641	0.0876764
MS17-45	serpentine	none	43.3483	0.0189291	1.10271	0.0310466	5.13566	38.5408	0.00341445	0.00102643	0.0325055	0.0631875	11.7056	0.882416	83.3782	8.47906	72.3809	0.417553	1.30474	0.208335	1.17939	0.428588	0.015272	0.671351	0.101961	0.689006	0.146099	0.386656	0.0565418	0.40696	0.0888072
MS17-45	serpentine	none	40.1235	0.0198988	1.83934	0.0944778	11.703	35.2382	0.00152965	0.00119296	0.0603897	0.0598794	10.8218	0.750688	192.1	11.4012	23.087	0.434119	1.47083	0.219288	1.28809	0.415399	0.0152878	0.64583	0.104741	0.743886	0.142181	0.387766	0.065831	0.451502	0.0967185
MS17-45	serpentine	none	42.0785	0.0150935	0.951658	0.0517424	7.52845	37.7495	0.00160418	0.000911063	0.0633321	0.0638129	11.4702	0.833728	130.544	7.10692	52.2142	0.531027	1.61521	0.263744	1.46475	0.515982	0.0157981	0.808047	0.128332	0.814242	0.176567	0.509344	0.0785036	0.567314	0.10355
MS17-45	serpentine	chlorite	35.5423	0.0165459	5.28354	0.0213876	13.3593	34.6035	0.00136956	0.00302214	0.0205602	0.0538684	11.0509	0.721466	238.711	1.36914	35.2939	0.431636	1.41804	0.232932	1.22245	0.482757	0.0174699	0.781034	0.134692	0.755252	0.178255	0.527209	0.0623672	0.480978	0.102686
MS17-45	serpentine	chlorite	40.1997	0.0352652	2.02392	0.0255049	9.83957	36.5516	0.00128304	0.00136953	0.0312211	0.06595	11.1946	0.7879	163.347	0.878877	41.7222	0.382622	1.29612	0.190423	1.09638	0.41325	0.0131832	0.679132	0.111857	0.676025	0.143372	0.425678	0.0567275	0.391944	0.075903
MS17-45	serpentine	chlorite	39.5497	0.0373164	4.36666	0.0530305	8.9907	35.4394	0.00124984	0.0590175	0.0591024	0.0712574	11.3443	0.797644	152.882	1.26294	62.9205	0.360271	1.16988	0.200741	1.2009	0.483906	0.01356	0.748902	0.119647	0.748902	0.1582	0.485679	0.0624824	0.463965	0.0810941
MS17-45	serpentine	chlorite	39.9273	0.0239112	7.14152	0.00321221	4.92486	36.2575	0.00108187	0.0141645	0.00384946	0.0641053	11.6195	0.880413	98.9207	5.73466	33.4876	0.178932	0.659177	0.112219	0.646806	0.284524	0.00989649	0.533704	0.0799672	0.47671	0.0980813	0.364491	0.0402487	0.305731	0.0675966

## Sheet: S7
	Si	Ca	Y	P	Zr	Hf	Al	Ta	Nb	Cu	Mn	Mg	Ti	Zn	Co	V	Ni	Cr	La	Ce	Pr	Nd	Sm	Eu	Gd	Tb	Dy	Ho	Er	Tm	Yb	Lu
Isotope	28	44	89	31	90	178	27	181	93	63	55	24	47	66	59	51	60	52	139	140	141	146	152	153	157	159	163	165	166	169	172	175
Detection limit (ppm)	1500	5	0.01	15	0.01	0.01	0.2	0.01	0.03	0.04	1	0.1	0.1	0.5	0.02	0.03	0.1	1	0.01	0.01	0.01	0.01	0.02	0.01	0.03	0.01	0.02	0.01	0.02	0.01	0.01	0.01
Unit	ppm	ppm	ppm	ppm	ppm	ppm	ppm	ppm	ppm	ppm	ppm	ppm	ppm	ppm	ppm	ppm	ppm	ppm	ppm	ppm	ppm	ppm	ppm	ppm	ppm	ppm	ppm	ppm	ppm	ppm	ppm	ppm
Sample	Si	Ca	Y	P	Zr	Hf	Al	Ta	Nb	Cu	Mn	Mg	Ti	Zn	Co	V	Ni	Cr	La	Ce	Pr	Nd	Sm	Eu	Gd	Tb	Dy	Ho	Er	Tm	Yb	Lu
MS17-02	7800	207	3.905	81.5	0.226	0.0115	3350	0.055	1.585	18.15	973.5	6550	7465	23.65	15.7	1360.5	15.76	37.45	0.833	2.235	0.287	1.455	0.4955	0.0355	0.67	0.1065	0.76	0.1485	0.483	0.054	0.4495	0.0755
MS17-02	4175	12.55	0.0745	17.85	0.00205		92	0.00065	0.00085	2.85	0.81	350	1.54	0.555	769	1.6	2845		0.00265	0.0195	0.0026	0.0063	0.0021		0.014	0.000455	0.00425	0.0006	0.0084		0.007
MS17-02	16500	139.5	4.025	23.9	0.299	0.01	8150	0.0585	1.5	95.5	1036	16350	7690	35.5	18.785	1344	24.35	43.7	0.985	2.35	0.284	1.315	0.3145	0.0245	0.598	0.0845	0.63	0.1655	0.4445	0.056	0.496	0.076
MS17-02	7650	192	2.88		0.51	0.0315	5660	0.3	3.85	1.145	1050	11800	8000	30.8	17.09	1302.5	17.24	56.8	0.7485	1.93	0.219	1.129	0.3395	0.044	0.3725	0.0835	0.5485	0.1105	0.3485	0.0451	0.28	0.0414
MS17-02	4550	360	1.091	14.85	0.204	0.0315	184.5	0.0265	0.103	0.3155	1290.5	673.5	10405	26.05	18.745	1686.5	42.8	139.05	0.0515	0.1465	0.02005	0.1595	0.0635	0.00995	0.134	0.02515	0.16	0.03735	0.127	0.00915	0.099	0.01585
MS17-02	3650	1170	13.7	8.7	5.4	0.285	2350	0.121	0.3965	2.95	1307.5	3850	10690	54	19.305	1826	47.25	529	0.472	1.595	0.3385	1.915	1.03	0.0805	1.595	0.356	2.405	0.515	1.535	0.1915	1.08	0.1345
MS17-02	47600	8850	8.355	12.3	0.762	0.0225	10800	0.094	1.38	21	930	40350	5775	32.75	19.1	1140	21.8	13.25	0.835	2.19	0.3445	1.71	0.6435	0.059	1	0.183	1.475	0.2955	0.84	0.1165	0.735	0.1565
MS17-02	10900	3285	6	3.05	1.02	0.052	1785	0.101	1.4365	0.0605	862	8950	6035	16.25	15.205	1271.5	14.2	18.005	1.295	3.17	0.442	1.995	0.627	0.054	0.89	0.139	0.985	0.2195	0.629	0.0825	0.565	0.1165
MS17-02	4700	184.65	2.935	8.4	0.19	0.023	3655	0.191	3.37	0.525	1455	7100	12550	28.25	16.415	1545.5	15.065	77.65	1.1265	2.78	0.3335	1.41	0.3115	0.019	0.493	0.081	0.515	0.125	0.3365	0.0455	0.35	0.056
MS17-02	705	217	1.155		0.359	0.033	400	0.02545	0.15	0.445	1339	857.5	11125	30.4	19.455	1552	43.5	1117.5	0.151	0.306	0.061	0.1955	0.0815	0.0128	0.103	0.02535	0.1995	0.03345	0.1055	0.0173	0.0975	0.0245
MS17-02	4850	197	4.065	16.05	0.3085	0.014	1837	0.053	1.329	17.05	964	3680	7645	24.45	16.365	1366.5	17.85	43.55	0.6455	1.8065	0.2335	1.36	0.4015	0.037	0.58	0.1085	0.82	0.155	0.4365	0.0535	0.448	0.082
MS17-04	3500	216.5	2.821	40	0.565	0.006	2415	0.0605	2.115	2.75	321	2745	418.5	21.55	8.025	33.295	4.71	10.59	0.3495	0.9525	0.128	0.727	0.295	0.0395	0.4725	0.06105	0.4765	0.0995	0.326	0.04465	0.261	0.02695
MS17-04	5700	195.5	3.16	20	0.0845	0.00485	3760	0.0705	2.595	22	318	4965	385	19.35	17.4	30.975	22.25	13.61	0.321	0.877	0.147	0.895	0.344	0.0555	0.54	0.0865	0.623	0.1215	0.2945	0.0375	0.202	0.02985
MS17-04	6330	96.5	3.09	20.15	1.15	0.0145	4310	0.045	2.2	14	333	5095	570	23.45	12.45	31.01	14	11.325	0.3645	0.949	0.1565	0.875	0.36	0.0305	0.484	0.084	0.4585	0.1075	0.3085	0.0395	0.197	0.03045
MS17-04	8815	215	2.675	16.25	0.0395	0.0019	5245	0.0545	2.4	2.8	346.5	6770	460	22.25	18.75	31.96	25.7	11.66	0.338	0.756	0.097	0.645	0.2775	0.0455	0.4505	0.07	0.425	0.0855	0.2375	0.0338	0.1325	0.02635
MS17-04	19700	3750	2.815	23.05	0.066	0.00695	4665	0.1545	4.65	6.6	600.5	11025	1915	28.5	322	15.6	605	8.8	0.3535	0.7715	0.1235	0.775	0.268	0.055	0.495	0.077	0.525	0.1085	0.321	0.036	0.1965	0.0287
MS17-04	18750	131.5	2.88	23.9	0.0485	0.0049	11945	0.068	2.64	48	506.5	16500	545.5	84	11.6	32.01	6.025	12.14	0.3175	0.863	0.129	0.805	0.349	0.0455	0.4585	0.0725	0.467	0.0965	0.2815	0.0376	0.2465	0.0251
MS17-04	15950	72	2.79	11.5	0.085		7800	0.017	1.41	12.7	406	11550	199	17.6	9.15	27.1	5.8	11.6	0.2405	0.6755	0.13	0.64	0.445	0.0495	0.615	0.0745	0.705	0.1075	0.246	0.0425	0.205	0.016
MS17-04	18250	38	2.155		0.039	0.0065	11090	0.0655	3	15.15	485	16500	1015	47.3	359.5	11.35	740	4.25	0.2675	0.69	0.103	0.52	0.1595	0.018	0.42	0.047	0.2495	0.0735	0.166	0.0305	0.057	0.0115
MS17-04	14350	60.5	2.34	28.5	0.9	0.0335	8840	0.051	2.575	105	388	12260	620	58.5	219.5	17.5	462.5	7.945	0.341	0.839	0.124	0.825	0.26	0.0435	0.42	0.068	0.429	0.089	0.21	0.01735	0.2	0.022
MS17-04	2900	250	0.82	9	0.012		1420	0.0345	1.33	2150	260.5	1815	315	39.5	241	20	365	5.15	0.147	0.2885	0.057	0.275	0.041	0.022	0.14	0.0315	0.175	0.0295	0.14	0.0155	0.1325	0.01345
MS17-04	1965	91.5	2.555	22.8	0.0165		1195	0.0435	2.455	4.5	294	1505	545	17.25	8.105	27.91	4.55	8.06	0.2335	0.739	0.1045	0.745	0.2285	0.0355	0.452	0.066	0.413	0.1135	0.2565	0.039	0.25	0.0315
MS17-04	4235	660	2.66	26.95	0.0205	0.004	2535	0.0209	2.3	0.565	316	3640	214	20.2	8.135	27.65	4.405	7.955	0.91	2.05	0.27	1.15	0.3	0.0725	0.53	0.065	0.515	0.0895	0.3425	0.0445	0.265	0.0415
MS17-28	16550	3465	1.15	20.45	0.632	0.058	11200	0.59	7.11	5.6	4430	20800	27750	22.55	55.65	2650	78.7	19.8	3.795	7.285	0.826	3.07	0.41	0.036	0.304	0.041	0.221	0.043	0.152	0.0174	0.201	0.046
MS17-28	2030	1035	2.14	10.65	2.96	0.1255	1555	0.62	5.93	0.34	3885	2395	25100	89.5	58.35	3312	160.45	8.275	0.95	2.645	0.3305	1.455	0.2675	0.0198	0.388	0.07	0.448	0.1015	0.3945	0.069	0.6015	0.143
MS17-28	8600	75	0.9955	5	0.52	0.038	5055	1.0195	11.98	10.15	6135	11500	43250	24.55	55	2912	80.35	11.9	2.02	4.42	0.4985	1.835	0.2895	0.02445	0.1835	0.03765	0.202	0.04215	0.136	0.0183	0.1845	0.04105
MS17-28	7135	68	0.8235	8.85	0.3275	0.025	3995	0.0735	1.285	0.295	1875	8280	10900	21.1	51.4	3043	84.95	23.95	0.91	2.125	0.277	1.205	0.1945	0.01775	0.206	0.02625	0.1825	0.03415	0.13	0.02005	0.2105	0.03995
MS17-28	1725	46.9	0.9805	4.5	1.35	0.059	1290	0.4705	5.93	0.74	4055	2525	25200	24.5	55.55	2967	96.2	7.37	1.355	3.13	0.346	1.365	0.2175	0.01675	0.2305	0.0336	0.2375	0.0492	0.1615	0.0261	0.2785	0.06025
MS17-28	860	301	0.9135	6	2.445	0.101	820	0.2625	4.67	40	4005	1735	25100	475	60.6	3111.5	99.9	7.215	1.755	4.3	0.378	1.595	0.2745	0.02555	0.2415	0.02895	0.1935	0.04475	0.1495	0.02345	0.2205	0.03855
MS17-28	3100	101.5	1.515	1.95	2.405	0.16	1680	0.7545	15.27	0.4085	8775	3905	57800	23.3	53.2	2977	80.45	1.79	2.8	6.14	0.7065	2.75	0.45	0.0275	0.335	0.05015	0.3225	0.0645	0.2975	0.04365	0.379	0.0855
MS17-28	2000	354.5	1.9	6.3	3.755	0.232	1050	0.329	4.94	0.485	4065	1930	24950	37.1	54.585	3396.5	131.3	1.855	1.275	4.125	0.4435	1.98	0.34	0.0395	0.39	0.065	0.48	0.108	0.3715	0.064	0.675	0.1575
MS17-28	2230	661	2.12	0.55	3.94	0.168	1170	0.272	3.385	0.805	3500	2080	21500	62.25	54.25	3280.5	133.55	17.075	1.205	3.345	0.406	1.635	0.311	0.0255	0.4065	0.06025	0.413	0.095	0.3615	0.063	0.631	0.179
MS17-28	4900	72.5	2.185	3	2.53	0.1825	1130	0.293	3.815	0.4	3875	6350	24800	25.6	51.6	3239	104	12.9	2.015	5.16	0.6115	2.555	0.42	0.0335	0.505	0.0755	0.485	0.106	0.404	0.066	0.555	0.147
MS17-28	3605	96	0.8895	6.7	1.19	0.1155	1405	0.2025	3.695	3.35	3225	3080	20250	27.45	53.6	3206	93.85	29.05	1.77	3.9	0.4425	1.98	0.31	0.0205	0.16	0.042	0.2125	0.043	0.136	0.01885	0.2085	0.0475
MS17-28	6330	5280	1.635	12.6	0.875	0.0845	3545	0.354	6.435	0.55	4745	6340	29500	17.57	49.15	3084	91.7	108.05	6.125	12.215	1.325	4.715	0.53	0.0425	0.455	0.0555	0.3105	0.0704	0.21	0.02715	0.27	0.0495
MS17-28	3400	288.5	1.155	7.85	1.745	0.0575	750	0.251	3.32	2.2	3540	3160	22150	22.55	51.905	3172.5	113.7	127.95	1.655	3.805	0.449	1.585	0.2745	0.0196	0.276	0.044	0.262	0.052	0.2095	0.036	0.333	0.073
MS17-28	700	910	1.335	4	1.53	0.0455	1235	0.53	7.55	1.905	6140	2595	40310	18.05	55.25	3112.5	86.75	132.4	3.68	7.45	0.83	3.325	0.5505	0.0485	0.375	0.0505	0.2965	0.0635	0.1755	0.02815	0.2365	0.0575
MS17-28	1050	460	1.58	0.4	3.4	0.165	890	0.526	8.635	1.135	6275	2100	41250	25	55.715	3044	87.75	10.795	1.0435	2.405	0.293	1.305	0.278	0.02	0.3045	0.0507	0.3665	0.0725	0.247	0.04655	0.368	0.09
MS17-28	375	2755	1.1145	2.85	5.15	0.185	745	0.505	10.02	0.515	7180	1072	45950	213	57.25	3576.5	75.55	4.39	3.705	7.725	0.8335	3.35	0.4345	0.0395	0.305	0.041	0.2545	0.048	0.166	0.0193	0.235	0.03715
MS17-28	1430	16.65	0.499	4.5	1.39	0.068	1229	0.446	5.87	0.196	4065	1833.5	26400	44.45	57.5	3105	131	21.025	0.475	1.2085	0.153	0.599	0.147	0.0097	0.1545	0.016	0.11	0.01915	0.092	0.01805	0.14	0.04385
MS17-28		41.3	3.395	9.5	14.8	0.6705	917	0.6295	12.39	0.335	10210	1625.5	69500	279	67.25	4526	124.15	42	0.82	3.28	0.4335	2.08	0.639	0.0405	0.69	0.132	0.835	0.152	0.61	0.117	1.085	0.2525
MS17-28	770	5.15	4.395	8.1	12.03	0.4755	2315	0.342	6.625	2.75	6356.5	1267.5	42405	1552	63.985	4662	148.9	36.325	0.278	2.1	0.319	1.685	0.62	0.0435	0.659	0.1525	1.036	0.2035	0.786	0.1325	1.37	0.3035
MS17-28	2200	10.1	4.105	5.55	8.345	0.315	1446	0.3385	4.03	0.605	5086.5	1111	33495	748.5	59.76	4847.5	107	17.445	0.245	1.3515	0.2155	1.13	0.445	0.0465	0.576	0.1345	0.94	0.181	0.6245	0.1325	1.215	0.27
MS17-31	1000	21	10.15	10.05	1625	40.5	1735	0.1865	3.5	0.68	1205.5	4400	6265	28.35	72.4	3216	99	1.88	0.345	2.2	0.178	1.07	0.34	0.062	0.545	0.1065	1.15	0.36	1.89	0.35	2.95	0.655
MS17-31	12585	80	0.92	23.95	69	2.1	5525	0.01555	0.665	0.89	1441.5	11450	7585	47.35	75.65	3250.5	95	11.905	0.3305	1.098	0.1495	0.695	0.154	0.00615	0.162	0.02475	0.179	0.031	0.1185	0.014	0.175	0.0415
MS17-31	2085	300.5	3.35	15	10	0.335	968	0.009	0.445	7	1363.5	3450	6310	72.5	69.05	2908	95.55	18.955	0.6055	1.8	0.226	1.07	0.2275	0.00825	0.395	0.079	0.575	0.0935	0.33	0.041	0.33	0.062
MS17-31		0.8	0.0565		1.26	0.1045	1285	0.01965	0.0715	0.0245	1289.5	605.5	6980	748.5	77.25	2058.5	108.9	0.925	0.0158	0.051	0.00535	0.0175			0.00455			0.0005	0.002	0.0012	0.00625	0.002
MS17-31	1550	317	1.015	7.65	1.97	0.084	1550	0.0055	0.5205	0.18	1241	3915	6360	26.1	68.25	3145	91.3	19.235	0.429	1.281	0.1865	0.795	0.1935	0.0148	0.233	0.0259	0.216	0.0318	0.1205	0.0182	0.121	0.0292
MS17-31	7150	269.5	1.455	6.3	12.85	0.3295	4385	0.4915	8.8	2	1925	10520	11650	35.75	67.95	3230.5	74.75	21.105	0.6105	1.925	0.261	1.205	0.3525	0.0154	0.354	0.0505	0.335	0.065	0.197	0.038	0.2975	0.0505
MS17-31	15050	2045	1.23	20.7	3.35	0.142	8950	0.48	8.5	33	2150	21750	11650	139	77.4	3495.5	87.7	14	0.68	1.975	0.2315	1.145	0.2365	0.021	0.322	0.0425	0.2445	0.048	0.1335	0.0191	0.158	0.0295
MS17-31	2900	1365	1.545	750	1.225	0.0385	790	0.0043	0.399	7.6	1480.5	2045	7630	46.5	69.55	3107	90.8	11.35	0.535	1.725	0.275	1.495	0.385	0.011	0.45	0.06	0.32	0.05	0.1435	0.01635	0.1195	0.01795
MS17-31	350	20.35	0.423	17	0.71	0.0485	325	0.00275	0.091	0.93	308	955	265	20.95	70.8	1620.5	79.1	2.575	0.1825	0.6	0.081	0.43	0.099	0.0032	0.083	0.01755	0.1	0.0133	0.06	0.006	0.029	0.0047
MS17-31	1815	85.5	0.244	9	0.8585	0.076	148.5	0.00545	0.162	0.275	1493.5	734.5	7060	48	77.2	3227	100.8	7.49	0.111	0.261	0.0355	0.1705	0.0325	0.0013	0.0425	0.00655	0.0355	0.00875	0.017	0.0026	0.035	0.0149
MS17-31	8055	214.5	0.9115	5.45	0.75	0.019	3945	0.0021	0.4065	0.605	1000	9795	4760	87	67.05	3140	80.05	14.125	0.4345	1.19	0.1655	0.6365	0.149	0.00985	0.171	0.0244	0.19	0.036	0.098	0.00865	0.1035	0.0214
MS17-31	4685	39	0.77	15.6	0.8135	0.0475	2665	0.00815	0.328	0.9	1133	5250	5560	99	70.9	3221.5	95.35	7.775	0.63	1.75	0.205	0.96	0.18	0.01275	0.178	0.01745	0.1205	0.0273	0.08	0.00885	0.0775	0.01945
MS17-31		835	0.89	5.35	0.503	0.023	2800	0.0037	0.4505	18	1422	6005	6275	210	71.65	3186.5	80.8	55.45	0.584	1.685	0.207	0.855	0.1655	0.0192	0.201	0.0228	0.1255	0.029	0.083	0.0098	0.102	0.0144
MS17-31	1355	35.95	0.3785	4.75	0.675	0.053	184.5	0.00635	0.251	0.665	1272.5	921	6680	29.35	80.3	3512.5	94.05	7.52	0.093	0.232	0.037	0.1825	0.0765	0.00295	0.0575	0.01015	0.0495	0.021	0.0355	0.00895	0.095	0.00925
MS17-31		122.5	0.3795	0.45	1.1565	0.0715	820	0.03155	0.2205	24	1725	1495	7490	106	79	2814.5	101.3	1.52	0.1355	0.4695	0.079	0.3635	0.1405	0.01285	0.1435	0.01515	0.0505	0.01075	0.0525	0.004	0.039	0.01645
MS17-31		1385	0.7305		1.915	0.0895	595	0.00925	0.865	0.35	1384.5	1735	8000	25.2	74.7	3408.5	97.45	5.725	0.4285	1.28	0.1825	0.709	0.118	0.00295	0.154	0.0176	0.146	0.0178	0.0925	0.013	0.09	0.01335
MS17-31	1400	2280	1.34	4.95	16.85	0.42	2145	0.3495	7.1	9.5	1376.5	2500	7705	116	78.6	2551.5	114.55	1.24	0.687	1.745	0.238	1.34	0.417	0.01145	0.384	0.0405	0.2685	0.0465	0.195	0.0345	0.38	0.0805
MS17-36	19300	153.5	1.035	20.75	0.128	0.0085	5100	0.01805	0.855	25.5	682.5	21150	2515	61	51.5	4955	125.2	7.43	0.975	2.43	0.2675	1.395	0.2755	0.033	0.3115	0.038	0.22	0.057	0.102	0.0105	0.0725	0.01065
MS17-36	5600	132.5	0.7665	22.35	0.084		1470	0.0405	1.6	9.95	1190	6150	6295	52	61.4	4911.5	125.4	6.68	1.185	3.35	0.385	1.69	0.3	0.0154	0.325	0.03575	0.1605	0.0365	0.08	0.01405	0.0885	0.00985
MS17-36	6950	79.5	0.85	4.6	0.078	0.0035	2855	0.03305	1.195	2.155	926.5	8900	4535	33.2	58.65	5002.5	118.9	5.32	0.561	1.383	0.1705	0.819	0.1995	0.0068	0.2255	0.02595	0.187	0.0341	0.092	0.00975	0.0715	0.0134
MS17-36	7250	860	0.9545	7.75	0.1175	0.0062	3885	0.055	2.195	1.445	1305	11200	7400	35.6	54.87	4891	121.9	5.25	2.825	4.65	0.425	1.505	0.2425	0.01255	0.259	0.03245	0.186	0.0394	0.0935	0.01235	0.0795	0.0141
MS17-36	11350	140	1.121	5.6	0.176	0.013	4550	0.0385	1.665	13.1	1000	14300	5165	62	48.4	4929	122	4.74	0.965	2.225	0.274	1.185	0.2285	0.01485	0.338	0.03455	0.2315	0.051	0.1345	0.01745	0.1125	0.0153
MS17-36	5125	88	0.582	5.85	0.1075	0.00925	1930	0.1	3.09	19	1530	5785	9200	45.5	58.05	4948	123.35	5.06	0.83	1.8	0.22	0.925	0.1815	0.0097	0.169	0.02495	0.146	0.02875	0.0745	0.00855	0.058	0.00955
MS17-36	8950	96.5	1.275	19.25	0.203	0.0105	4395	0.082	2.285	495	1255	10650	6985	67	83	5126.5	200	10.815	0.84	2.46	0.296	1.205	0.253	0.0158	0.261	0.0278	0.2225	0.0425	0.12	0.01905	0.11	0.02035
MS17-36	4450	550	0.697	17.75	1.5	0.0275	299	0.0305	1.53	1.12	1111	1535	6250	26.65	58.15	5106	124.4	6.565	0.4045	1.21	0.148	0.705	0.1405	0.0153	0.151	0.025	0.1515	0.01885	0.05	0.01095	0.0535	0.01445
MS17-36		250	1.06	21.5	0.162		241.5	0.0185	1.135	6.15	890	1785	4480	74	59.7	5055.5	120.15	5.89	0.975	2.75	0.335	1.5	0.325		0.345	0.0395	0.25	0.041	0.086	0.009	0.0675	0.0098
MS17-36	6365	290.5	0.7175	34.6	0.23	0.009	177.5	0.0325	1.975	0.229	914.5	1155	4245	26.3	54.4	4928.5	128.4	7.56	1.46	2.83	0.2915	1.18	0.2145	0.013	0.1425	0.027	0.174	0.027	0.0765	0.0102	0.0835	0.01255
MS17-36	2155	404	0.6295	4.75	0.132	0.0075	1100	0.1535	4.31	14.9	2120	3295	11050	112.65	55	5015.5	123.05	7.995	1.22	2.495	0.254	1.09	0.215	0.019	0.17	0.02785	0.159	0.029	0.098	0.0112	0.0705	0.0089
MS17-36	4550	433	1	18.5	0.0925	0.01	1425	0.0895	2.32	13.25	1551.5	4380	6555	134.95	57.45	5132	127.35	0.98	1.1235	2.675	0.3075	1.29	0.221	0.046	0.264	0.0339	0.199	0.03	0.103	0.00955	0.107	0.0172
MS17-36	2100	29.9	0.715	8.4	0.29	0.009	84	0.076	2.17	3.15	1175	633	6200	46.5	58.65	5358.5	165.45	12.9	0.1855	0.4715	0.0545	0.2915	0.101	0.0067	0.101	0.02575	0.1505	0.033	0.0755	0.01075	0.0605	0.0156
MS17-36	10200	79.5	0.6055	22.3	0.104		2255	0.04	1.43	0.62	1110	6330	5805	31.8	59.4	4937.5	124.8	5.02	0.3865	0.886	0.1195	0.485	0.1655	0.00625	0.1495	0.02415	0.139	0.024	0.041	0.00805	0.0575	0.0031
MS17-36	4450	64	0.568	10.6	0.1	0.006	387	0.035	1.225	145	975	3775	4670	38.85	62.65	5090	139.5	7.485	0.257	0.715	0.1285	0.365	0.1375		0.1395	0.018	0.0975	0.00775	0.0305	0.013	0.0495	0.00205
MS17-36	2000	565	0.795	3.9	1.95	0.033	705	0.138	3.825	0.725	1927.5	2535	12385	36.15	64.8	5336.5	143.6	8.38	0.3295	1.02	0.1365	0.565	0.137	0.0042	0.173	0.01955	0.139	0.02475	0.084	0.00785	0.092	0.0146
MS17-36		48	0.5255	17.65	0.1645	0.0056	178.5	0.023	0.693	0.54	981.5	1080	4460	39.85	62.05	5176	159.55	8.16	0.166	0.562	0.0855	0.3365	0.0825	0.005	0.097	0.02605	0.119	0.01545	0.0725	0.00475	0.0545	0.011
MS17-36	4050	213	0.915	14.5	0.0825	0.014	2950	0.0725	2.255	4.3	1395	6050	6780	95.55	62.9	5265	149	4.71	1.075	2.8	0.35	1.27	0.195	0.024	0.1545	0.031	0.1325	0.026	0.067	0.012	0.076	0.01575
MS17-36	4450	547.5	1.065	13.85	0.1425		2430	0.05	1.76	180	1489.5	6060	5575	144	59.41	5119.5	129.55	1.68	1.087	2.795	0.304	1.21	0.2765	0.036	0.204	0.0365	0.1815	0.0275	0.0995	0.0111	0.085	0.00765
MS17-36	19950	59.5	1.07	10.25	0.1085	0.0019	7400	0.0375	1.3	5	940	25800	4875	26.7	49.5	4966.5	126.85	2	0.685	1.67	0.2005	0.905	0.257	0.01505	0.251	0.0339	0.1895	0.03465	0.1145	0.01535	0.0945	0.016
MS17-36	9450	164.5	1.13	10	0.136	0.0068	2770	0.064	2.02	94.5	1235	12200	6700	49.6	55.5	4901.5	128.2	2.045	0.755	2.01	0.2245	0.9335	0.2195	0.008	0.251	0.03915	0.221	0.04265	0.1115	0.01385	0.0965	0.01785
MS17-36	18200	222.5	1.58	12.3	0.2035	0.0131	4745	0.116	3.765	240	1520	23400	8840	455	50.9	4809.5	123.2	3.4	1.134	2.9	0.355	1.445	0.341	0.00705	0.358	0.042	0.316	0.072	0.1455	0.0198	0.158	0.029
MS17-37	25350	466	1.1245	11.7	0.111	0.0073	9895	0.139	4.235	6.75	2015	31900	10700	103.1	53.75	4177	80.55	45.1	1.52	3.065	0.334	1.39	0.2965	0.0475	0.3555	0.0378	0.253	0.0416	0.101	0.0116	0.11	0.01805
MS17-37	1095	257.5	0.8405	5.4	0.455	0.0136	514.5	0.111	3.3	430	1560	2300	8600	290	60.55	4322	97.1	50.3	0.6785	1.765	0.201	0.9035	0.2015	0.01425	0.2085	0.03005	0.2015	0.03655	0.103	0.01355	0.08	0.0161
MS17-37	7690	193	0.8715	8.4	0.176	0.0165	3765	0.254	7.27	190	2615	10335	16900	145	62.35	4245.5	94.2	77.3	0.9635	2.105	0.234	1.11	0.1935	0.01295	0.355	0.0254	0.1775	0.0423	0.096	0.0121	0.089	0.01405
MS17-37	6800	335.5	0.838	4.5	0.112		3270	0.087	2.915	8.35	1370	10020	7650	41.4	53.25	4273	82.4	47.65	0.7195	1.71	0.2125	0.745	0.197	0.01425	0.2765	0.0307	0.162	0.0335	0.1095	0.0103	0.076	0.02065
MS17-37	4700	217.5	0.7485	2.45	0.101		1935	0.1345	4.64	36	1805	6150	10405	80.5	57.05	4268.5	81.9	56.35	0.6775	1.59	0.191	0.765	0.162	0.00755	0.222	0.031	0.174	0.02745	0.1025	0.01435	0.075	0.01335
MS17-37		131.5	0.79	0.65	0.189	0.00365	852.5	0.1365	4.945	73	1925	2520	12315	46.85	60	4587.5	94.3	5.95	0.6885	1.745	0.2175	0.915	0.232	0.00665	0.2915	0.02575	0.1505	0.03485	0.0755	0.0156	0.077	0.01915
MS17-37	3605	229	0.7095	5.85	0.0765	0.00295	1435	0.087	2.715	255	1315	5240	6995	123.5	52.9	4174.5	82	53.05	0.6875	1.59	0.1905	0.715	0.1515	0.01	0.203	0.02375	0.1635	0.03405	0.111	0.01455	0.053	0.01005
MS17-37	3530	270.5	1.2085	80.5	0.2	0.0044	677	0.1715	4.41	20.3	1886.5	4285	10590	74.65	56.02	4359.5	101.35	60.8	0.832	2.15	0.266	1.125	0.3315	0.01535	0.2365	0.0538	0.245	0.0552	0.144	0.0228	0.091	0.0125
MS17-37	2035	201.5	1.387	5.85	0.2825	0.0105	484.5	0.1925	5.81	10.35	2090	2765	12865	71.05	60.695	4542.5	106.8	54.75	0.8605	2.455	0.3165	1.42	0.2745	0.0194	0.376	0.056	0.31	0.0585	0.1795	0.0239	0.1605	0.0207
MS17-37	4050	189.5	1.105	9.75	0.2545	0.021	900	0.13	4.02	40	1790	4100	10680	95.5	58.85	4371	101	11.7	0.5825	1.565	0.1885	0.845	0.2105	0.01435	0.29	0.03545	0.246	0.045	0.1325	0.02075	0.146	0.0169
MS17-37		770	1.71	12.2	0.198	0.0203	341	0.17	5.77	1.545	2695	1235	13860	57.25	61.46	4707.5	116.2	25.45	0.775	2.74	0.303	1.555	0.442	0.02495	0.4785	0.0709	0.368	0.0755	0.1715	0.01725	0.102	0.0212
MS17-37	2310	455	2.05	325	0.1465	0.0185	375	0.01355	0.534	0.35	541.5	2900	1812.5	21.2	54.725	4258	90.25	1.615	0.815	2.25	0.33	1.525	0.415	0.017	0.46	0.069	0.415	0.0765	0.235	0.0255	0.122	0.02415
MS17-37	1080	81.5	0.412	12.45	0.2785	0.0044	233.5	0.0012	0.2375	20	712.5	1240	2755	28.3	59.935	4636	112.2	0.115	0.222	0.5855	0.073	0.3035	0.055	0.0023	0.091	0.01335	0.101	0.01605	0.0525	0.0088	0.074	0.01385
MS17-37	7700	206.5	1.495	8.55	0.3105	0.0165	1685	0.6225	23	215.5	6765	10700	46650	102	53.8	4136.5	81.3	54.95	2.365	5.04	0.555	2.01	0.3795	0.0201	0.308	0.056	0.3405	0.071	0.21	0.02655	0.1375	0.03165
MS17-37	7800	179.5	0.863	6.45	0.1395	0.00695	1605	0.1025	3.315	58.5	1622.5	9400	9080	81	56.285	4322.5	84.65	24.65	0.685	1.69	0.2125	0.8315	0.1885	0.0092	0.2385	0.0318	0.1895	0.034	0.11	0.012	0.0835	0.01375
MS17-37	2000	239.5	1.2425	10.3	0.233	0.0099	509	0.251	9	36	3125	2655	19700	94.5	57.5	4551	102.15	40.05	0.58	1.61	0.2195	0.985	0.2735	0.01765	0.247	0.05105	0.281	0.056	0.154	0.0203	0.1485	0.0172
MS17-45	3450	156.5	0.717	16.05	1.155	0.0885	1275	0.5795	11.185	2.55	3520	3730	25950	40.9	50.05	4170	123.55	401.65	0.3705	0.86	0.1085	0.395	0.0965	0.01125	0.174	0.02505	0.1175	0.03045	0.131	0.0131	0.114	0.0256
MS17-45	4090	19	0.254	11.05	0.5385	0.024	960		0.073	6.35	1082	2400	6205	20.7	49.7	3728	101.05	16.445	0.089	0.255	0.0375	0.1675	0.039	0.0029	0.0415	0.0076	0.054	0.01135	0.058	0.00395	0.0385	0.0134
MS17-45	875	4.1	0.0835	9.35	0.6135	0.0175	505.5	0.0014	0.036	0.625	1160	845.5	6900	43.85	47.405	4096.5	106.1	5.975	0.093	0.1955	0.0196	0.0655	0.013	0.0013	0.014	0.00145	0.021	0.00385	0.0107	0.004	0.009	0.00135
MS17-45	4670	204.5	1.0675		0.4265	0.023	597.5	0.00535	0.141	0.37	1212.5	2390	7435	22.05	45.95	3792.5	70.1	1.39	0.197	0.564	0.0745	0.4805	0.1815	0.006	0.18	0.0255	0.175	0.03765	0.0995	0.02015	0.1535	0.02395
MS17-45			0.5395		1.345	0.1005	1116	0.63	11.65	0.42	3595	1535	28450	371.5	51.54	4721	108.65	199.35	0.088	0.3625	0.0364	0.2175	0.067	0.001	0.0435	0.0108	0.1075	0.02345	0.0845	0.0127	0.152	0.0312
MS17-45	1905	530	0.6865	11.2	0.75	0.064	565.5	0.394	8.42	4.35	3795	2535	29300	36.9	52	4493.5	90.75	118.85	0.5345	1.087	0.142	0.4805	0.1345	0.008	0.1425	0.0191	0.162	0.03705	0.1285	0.0164	0.123	0.02205
MS17-45		18	0.5485		0.335	0.041	725	0.3095	4.955	0.475	2720	2280	21875	21.2	45.005	4788.5	68.55	149.6	0.2705	0.5815	0.0755	0.3525	0.0775	0.0021	0.13	0.01275	0.156	0.018	0.0785	0.01125	0.1315	0.01695
MS17-45	1900	300.5	0.5255	12.2	0.4835	0.038	1665	0.301	3.825	1.8	1770	4000	12850	21.75	47.505	3917.5	82.4	236.9	0.221	0.513	0.05855	0.301	0.065	0.00215	0.0805	0.01285	0.078	0.02095	0.067	0.01055	0.0845	0.0251
MS17-45		2.3	0.113		0.367	0.017	1226	0.00295	0.02485	0.295	1472	1055.5	9755	384.5	48.23	3870.5	126.7	51.6	0.1635	0.3075	0.03235	0.1385	0.018	0.00415	0.0195	0.0033	0.0165	0.0026	0.018	0.0009	0.0195	0.0031
MS17-45		6.35	0.2995	13.05	0.8605	0.06	1508	0.4075	7.18	0.37	2524.5	1365	19265	436	51.1	4760	130.95	250.4	0.0124	0.1095	0.0153	0.1085	0.021		0.0475	0.0113	0.0595	0.01845	0.042	0.00725	0.095	0.02185
MS17-45	4505	30.45	0.445	10.6	1.1105	0.0595	1301.5	0.326	6.205	0.314	2685	1417	20400	454	50.315	4978.5	127.85	165.25	0.0815	0.3085	0.0515	0.1975	0.069	0.00315	0.0665	0.00945	0.07	0.0142	0.0655	0.01085	0.1335	0.02695
MS17-45	7200	39.5	0.925		0.501	0.044	3310	0.378	6.815	0.5825	3180	9800	25700	45.3	47.65	4575	68.4	132.35	0.327	0.825	0.1125	0.5755	0.1395	0.00585	0.2065	0.03225	0.189	0.04535	0.1085	0.01785	0.15	0.0264
MS17-45	13550	214.5	1.43	22.15	0.4065	0.02	7750	0.725	14.5	2.65	4140	17900	30800	36.65	43.16	3670	55.6	312.7	0.88	1.9	0.2365	1.19	0.27	0.01545	0.3315	0.0455	0.3705	0.062	0.2015	0.0249	0.1535	0.0375
MS17-45	2295	123	0.923	8.7	0.3925	0.0235	830	0.2465	5.95	6.3	1970	3260	13900	29.95	95	2850	231	94.5	0.45	0.9375	0.122	0.63	0.1835	0.00525	0.1985	0.034	0.2445	0.036	0.0855	0.0183	0.1365	0.0271
MS17-45	20500	164.5	1.465	16.5	0.71	0.027	11150	0.373	9.29	4.95	3090	26700	22350	28.75	48.1	3445	61.6	206.55	0.618	1.42	0.1955	0.885	0.2415	0.0121	0.3175	0.0529	0.33	0.06375	0.1775	0.02675	0.183	0.03495
MS17-45	4290	79.5	1.1335	21.2	0.3985	0.035	2310	0.4305	10.2	3.85	3345	5990	25900	23.35	50.05	3955	56.6	180.95	0.4335	0.9585	0.1325	0.5965	0.1965	0.00595	0.182	0.03635	0.2685	0.04735	0.1735	0.026	0.155	0.0319

## Sheet: S8
Sample MS17-28
Wt% Oxides	Magnetite	Ilmenite		Magnetite	Ilmenite		Magnetite	Ilmenite		Magnetite	Ilmenite
SiO2	2.45163	0.308533		1.52153	1.01383		1.63414	1.33095		2.2539	0.157691
TiO2	4.24608	48.3082		1.91689	47.1519		2.23418	47.983		4.08945	48.2632
Al2O3	1.38007	0.206862		0.622654	0.0617201		0.0662064	0.536529		0.543863	0.0261778
Fe2O3(T)
FeO(T)	88.224	44.8748		92.9266	45.6386		95.0694	43.2015		90.0475	45.335
MnO	0.51449	5.42866		0.273871	5.45941		0.317911	5.38949		0.508849	5.43316
MgO	2.4022	0.736673		0.676518	0.579414		0.166106	1.46786		1.47793	0.601881
CaO	0.317489	0.02909		1.56046	0.00726008		0.00509987	0.00982864		0.586512	0.0839763
Na2O	0.0330571	0.0151036		0.00458586	0.00203961		0.00155974	0.00386507		0.0111238	0.00399142
K2O	0.00300817	0.00321328		0.00130829	0.000834696		0.0012708	0.00175717		0.00204029	0.00791434
Cr2O3	0.00309013	0.000282525		0.00270483	0.00062678		0.00360304	0.000813301		0.00963024	0.000537264
BaO
ZnO	0.00311799	0.00401647		0.00244419	0.0038341		0.0031705	0.00404157		0.00290309	0.00584755
V2O3	0.410109	0.0661147		0.476563	0.0629936		0.482917	0.0507036		0.454454	0.0630126
NiO	0.0108658	0.00146026		0.013645	0.00143238		0.0141793	0.00162637		0.0112085	0.00130834
Nb2O3	0.000818072	0.0169354		0.000242425	0.0161177		0.000257011	0.0180304		0.000608587	0.0162767
Calc. Methods:	Mol % Usp	Mol % Ilm		Mol % Usp	Mol % Ilm		Mol % Usp	Mol % Ilm		Mol % Usp	Mol % Ilm
Carmichael (1967)	0.197463	0.913674		0.10494	0.908901		0.118637	0.924034		0.188284	0.91086
Anderson (1968)	0.0474579	0.899046		0.0313935	0.879934		0.0527257	0.896378		0.0684898	0.896628
Lindsley & Spencer (1982)	0.11896	0.902535		0.0539668	0.883024		0.0619189	0.903742		0.11453	0.899303
Stormer (1983)	0.116319	0.91028		0.0509355	0.902304		0.0635354	0.924073		0.111418	0.904858
Geothermometer by: Powell and Powell (1977)
X'Usp & X'Ilm from:	Temp (°C)			Temp (°C)			Temp (°C)			Temp (°C)
Carmichael (1967)	703.314			629.571			623.609			700.538
Anderson (1968)	561.039			541.449			573.147			598.071
Lindsley & Spencer (1982)	651.66			587.509			580.998			650.952
Stormer (1983)	639.572			564.29			560.734			641.216
Average:	638.896			580.705			584.622			647.694
Geothermobarometer by: Spencer and Lindsley (1981)
X'Usp & X'Ilm from:	Temp (°C)	log10 fO2		Temp (°C)	log10 fO2		Temp (°C)	log10 fO2		Temp (°C)	log10 fO2
Carmichael (1967)	715.296	-15.6063		680.952	-15.9593		667.361	-16.8459		715.987	-15.4853
Anderson (1968)	649.596	-16.0739		643.96	-15.5593		657.277	-15.8639		670.668	-15.6693
Lindsley & Spencer (1982)	695.803	-15.4923		669.563	-15.2644		658.546	-16.1073		697.131	-15.3597
Stormer (1983)	685.125	-15.9489		650.122	-16.1837		636.847	-17.3451		689.171	-15.6781
Average:	686.455	-15.7804		661.149	-15.7417		655.008	-16.5405		693.239	-15.5481
Geothermobarometer by: Andersen and Lindsley (1985)
X'Usp & X'Ilm from:	Temp (°C)	log10 fO2		Temp (°C)	log10 fO2		Temp (°C)	log10 fO2		Temp (°C)	log10 fO2
Carmichael (1967)	736.155			701.157			688.416			736.644
Anderson (1968)	665.936	-15.8053		658.147	-15.361		674.167	-15.6081		688.819	-15.4162
Lindsley & Spencer (1982)	716.018	-15.2208		686.351	-15.0715		676.288	-15.8183		717.077	-15.1072
Stormer (1983)	705.714	-15.6273		666.826	-15.9012		654.309	-16.9661		709.383	-15.3895
Average:	705.956	-15.5511		678.121	-15.4446		673.295	-16.1308		712.981	-15.3043
Average all data for each analytical pair	677.102	-15.6821		639.992	-15.6144		637.642	-16.3649		684.638	-15.4436
Δ log fO2 (FMQ)		1.79742			2.96325			2.28521			1.82332
References:
Anderson, A.T., 1968. Oxidation of the La Blanche Lake titaniferous magnetite deposit, Québec. Journal of Geology 76 (4), 528-547.
Andersen, D.J., Lindsley, D.H., 1985. New (and final!) models for the Ti-magnetite/ilmenite geothermometer and oxygen barometer. Abstract AGU 1985 Spring Meeting Eos Transactions. American Geophysical Union 66 (18), 416.
Carmichael, I.S.E., 1967. The iron-titanium oxides of salic volcanic rocks and their associated ferromagnesian silicates. Contributions to Mineralogy and Petrology 14 (1), 36-64.
Lepage, L.D., 2003. ILMAT: an excel worksheet for ilmenite--magnetite geothermometry and geobarometry. Comput. Geosci. 29 (5), 673-678.
Lindsley, D.H., Spencer, K.J., 1982. Fe-Ti oxide geothermometry: Reducing analyses of coexisting Ti-magnetite (Mt) and ilmenite (Ilm) abstract AGU 1982 Spring Meeting Eos Transactions. American Geophysical Union 63 (18), 471.
Powell, R., Powell, M., 1977. Geothermometry and oxygen barometry using coexisting iron-titanium oxides: a reappraisal. Mineralogical Magazine 41 (318), 257-263.
Spencer, K.J., Lindsley, D.H., 1981. A solution model for coexisting iron-titanium oxides. American Mineralogist 66 (11-12), 1189-1201.
Stormer Jr, J.C., 1983. The effects of recalculation on estimates of temperature and oxygen fugacity from analyses of multi-component iron-titanium oxides. American Mineralogist 68 (5-6), 586-594.
