# Supplementary material
Source: MDPI journal article supplement (https://www.mdpi.com/2076-3263/9/3/110)
Supplement: s1 [file s1 › Supplemental_material_S9.pdf]

## Sample MS17-31

(reflected light)

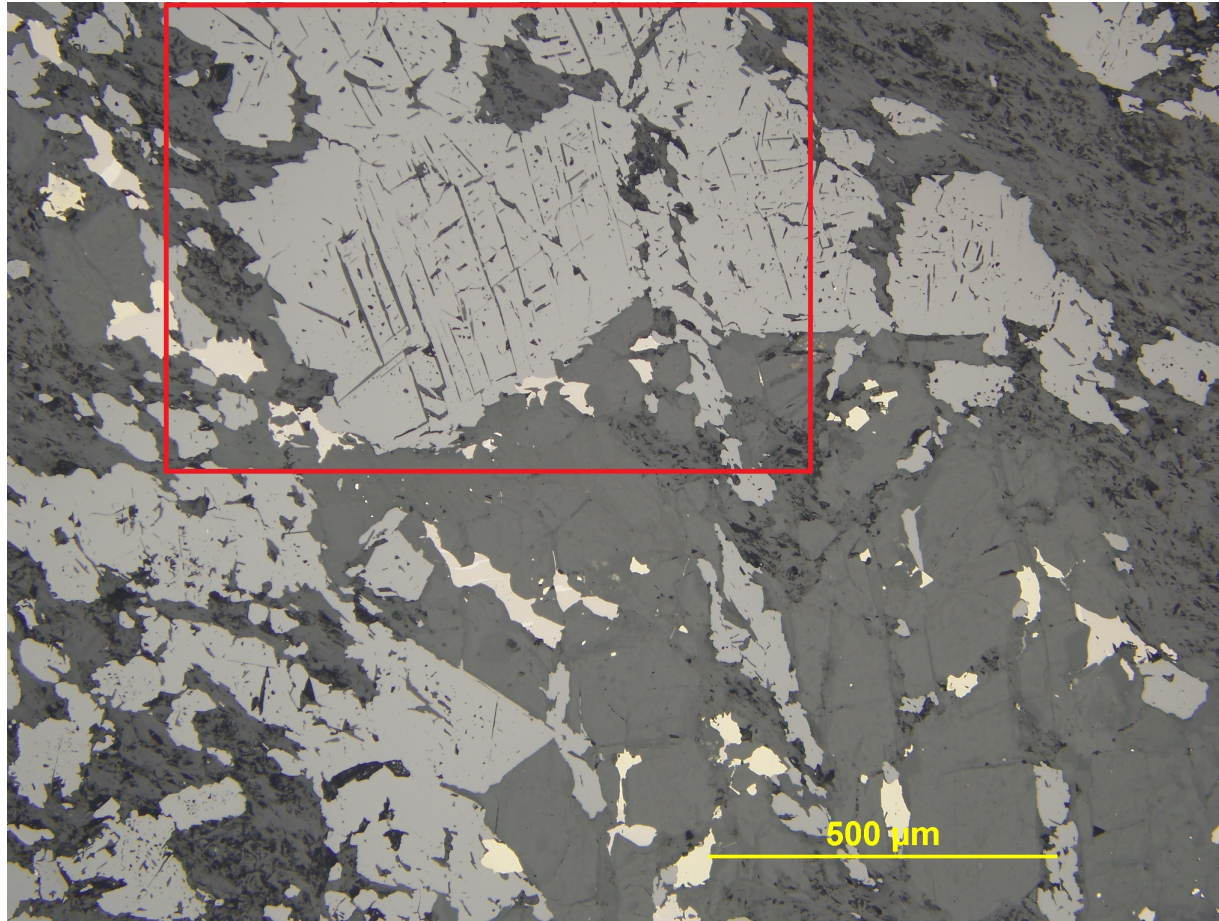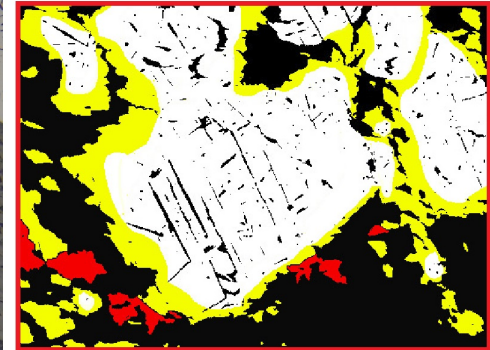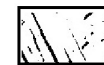

70%  
Inclusion-bearing  
magnetite

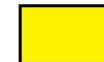

30%  
Inclusion-free  
magnetite

## Sample MS17-36

(reflected light)

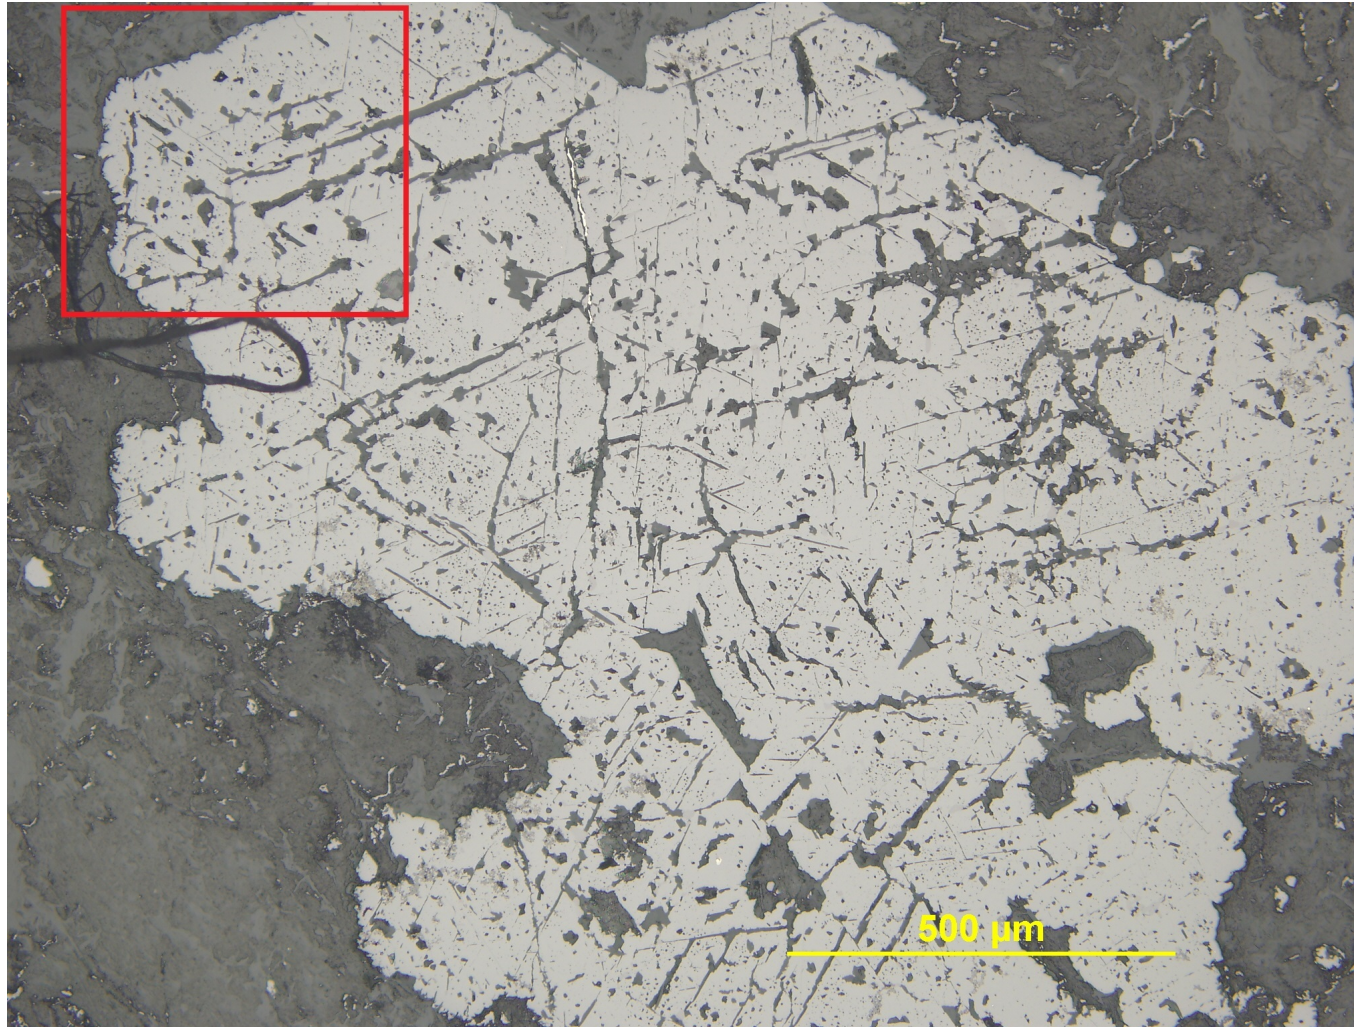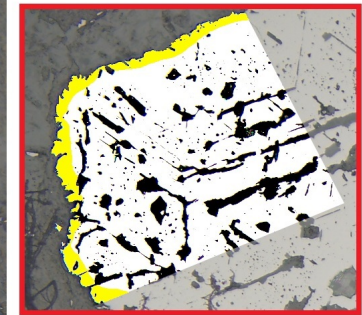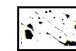

92.1 %

Inclusion-  
bearing  
magnetite

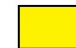

7.9 %

Inclusion-free  
magnetite

## Sample MS17-36

(reflected light)

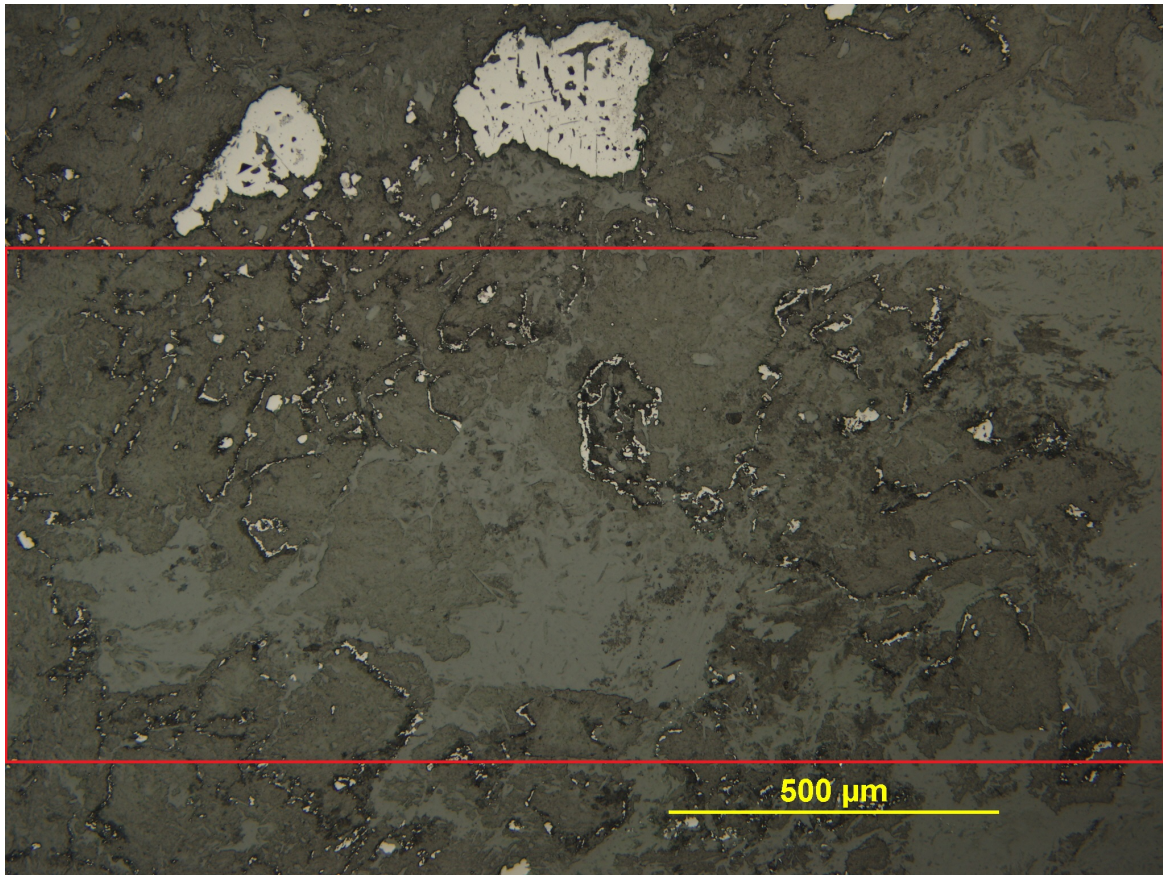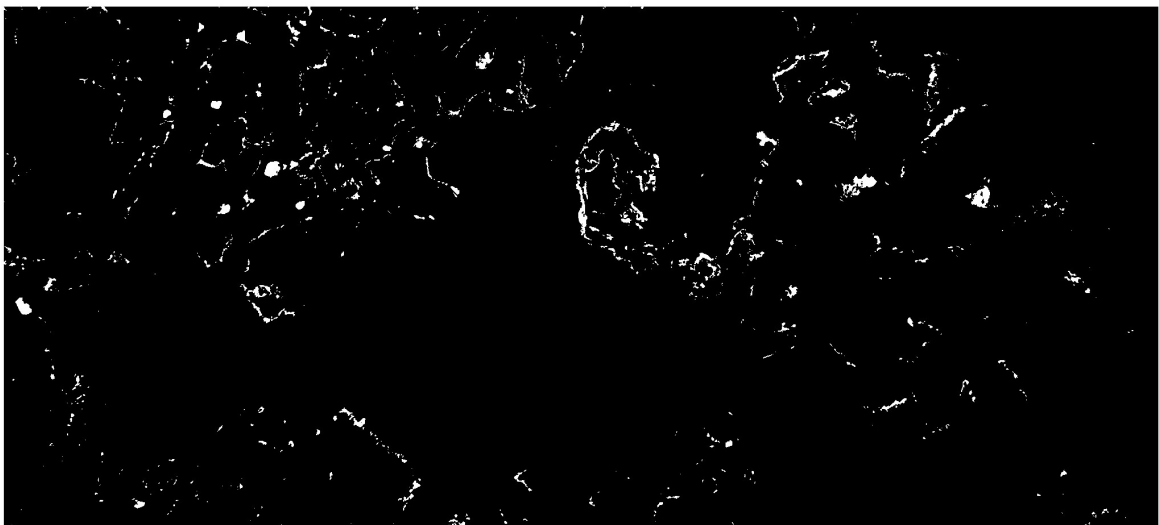

Processed (black & white) image:

- Black = serpentine + brucite  $\pm$  chlorite (98.6 %)
- White = inclusion-free magnetite (1.4 %)

## Sample MS17-45

(reflected light)

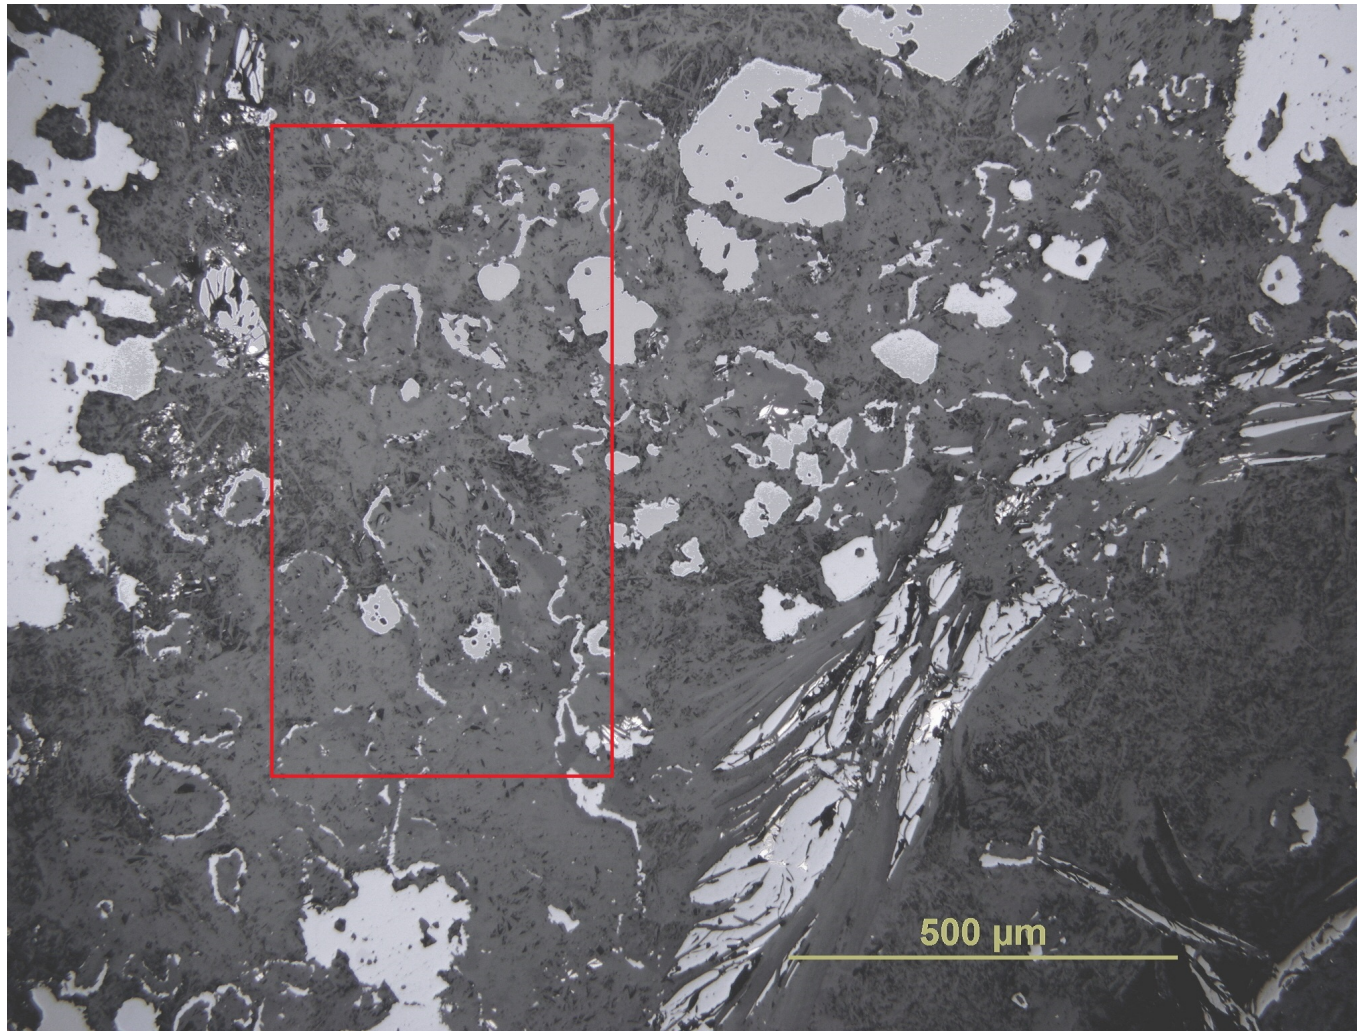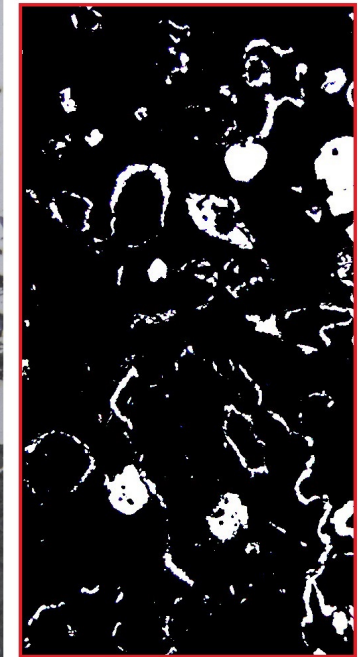

- 90.4 %  
Serpentine  
+ brucite
- 9.6 %  
Inclusion-free  
magnetite
